# Supplementary material for: A systematic review of faculty development programs based on the Harden teacher’s role framework model
Source: PubMed Central journal article supplement (PMC10690997; doi:10.1186/s12909-023-04863-4), 2023-11-30
Supplement: 12909_2023_4863_MOESM2_ESM.pdf [file 12909_2023_4863_MOESM2_ESM.pdf]

**Appendix 2.** The Coding Sheet.

| Authors<br>(year) | Country<br>and<br>institution | Type of<br>Program or<br>Intervention<br>and duration | Participants<br>(n) | Faculty roles<br>covered by<br>the program<br>(The teacher as :) | Study<br>design | Outcomes | Outcome Level |    |    |   |    |    | Study<br>quality.<br>MERSQI<br>score<br>out of 18 |
|-------------------|-------------------------------|-------------------------------------------------------|---------------------|------------------------------------------------------------------|-----------------|----------|---------------|----|----|---|----|----|---------------------------------------------------|
|                   |                               |                                                       |                     |                                                                  |                 |          | 1             | 2A | 2B | 3 | 4A | 4B |                                                   |
|                   |                               |                                                       |                     |                                                                  |                 |          |               |    |    |   |    |    |                                                   |
|                   |                               |                                                       |                     |                                                                  |                 |          |               |    |    |   |    |    |                                                   |
