# Supplementary material for: A systematic review of faculty development programs based on the Harden teacher’s role framework model
Source: PubMed Central journal article supplement (PMC10690997; doi:10.1186/s12909-023-04863-4), 2023-11-30
Supplement: 12909_2023_4863_MOESM3_ESM.pdf [file 12909_2023_4863_MOESM3_ESM.pdf]

**Table S1** Summary of included studies.

| Authors (year)      | Country and institution                | Type of Program or Intervention and duration | Participants (n)                        | Faculty roles covered by the program (The teacher as :)                                                                 | Study design                | Outcomes                                                                                                                                                                       | Outcome Level |    |    |   |    |    | Study quality. MERSQI score out of 18 |    |
|---------------------|----------------------------------------|----------------------------------------------|-----------------------------------------|-------------------------------------------------------------------------------------------------------------------------|-----------------------------|--------------------------------------------------------------------------------------------------------------------------------------------------------------------------------|---------------|----|----|---|----|----|---------------------------------------|----|
|                     |                                        |                                              |                                         |                                                                                                                         |                             |                                                                                                                                                                                | 1             | 2A | 2B | 3 | 4A | 4B |                                       |    |
| Stein et al. (2012) | USA, Washington State University       | A 1-day teaching-methods course              | 12 pharmacy and nursing faculty members | Information provider and coach                                                                                          | One group, Pretest-posttest | Significant improvement in 7 of 10 domains of teaching effectiveness; self-reported changes in participants' perceptions of their teaching effectiveness.                      |               | √  | √  |   |    |    |                                       | 13 |
| Zagar et al. (2019) | USA, University of Louisiana at Monroe | A year-long book club                        | 48 pharmacy faculty members             | Information provider and coach- Facilitator of learning and mentor- Assessor and diagnostician - Scholar and researcher | One group, Pretest-posttest | Increased ability to describe the characteristics of a student-centered approach to teaching, the components of the pharmacy education system, the components of assessment in | √             | √  | √  | √ |    |    | 9.5                                   |    |

|                       |                                               |                                                                         |                                                    |                                     |                                         |                                                                                                                                                                                                                                              |   |   |   |  |  |  |      |
|-----------------------|-----------------------------------------------|-------------------------------------------------------------------------|----------------------------------------------------|-------------------------------------|-----------------------------------------|----------------------------------------------------------------------------------------------------------------------------------------------------------------------------------------------------------------------------------------------|---|---|---|--|--|--|------|
|                       |                                               |                                                                         |                                                    |                                     |                                         | pharmacy education and the roles and responsibilities of a student mentor.                                                                                                                                                                   |   |   |   |  |  |  |      |
| Fleming et al. (2015) | USA, Vanderbilt University School of Medicine | A facilitated peer mentoring program, monthly for 1.5 hours for 2 years | 104 junior faculty in the Department of Pediatrics | Professional-Scholar and researcher | Cohort with a survey at two time points | Significant improvement in participants' self-reported knowledge, skills, and attitudes (KSA) in the domains of professional development and scholarship, including the ability to write career goals and align activities with those goals. | √ | √ |   |  |  |  | 10.5 |
| Grimes et al. (2000)  | USA, Berlex Foundation                        | A 6-day faculty development course                                      | 65 faculty physicians                              | Scholar and researcher              | One group, Pretest-posttest             | Increases in participants' cognitive knowledge of research                                                                                                                                                                                   |   |   | √ |  |  |  | 10   |
| Johnstone-            | USA, forty-                                   | A four-week online                                                      | 5 dental                                           | Information provider and            | One group,                              | Significant increases in                                                                                                                                                                                                                     | √ | √ |   |  |  |  | 11.5 |

|                           |                                            |                                       |                                           |                                          |                             |                                                                                                                                                                                                                                                                                      |   |  |  |   |  |  |    |
|---------------------------|--------------------------------------------|---------------------------------------|-------------------------------------------|------------------------------------------|-----------------------------|--------------------------------------------------------------------------------------------------------------------------------------------------------------------------------------------------------------------------------------------------------------------------------------|---|--|--|---|--|--|----|
| Dodge et al. (2014)       | seven U.S. dental hygiene programs         | faculty development course            | hygiene faculty members                   | coach-Facilitator of learning and mentor | Pretest-posttest            | participants' perceptions of the importance of four practices: activities promoting relevant, lifelong learning; faculty communication fostering a sense of community; encouraging students' self-introduction; and encouraging productive dialogue and respecting diverse opinions. |   |  |  |   |  |  |    |
| Jackevicius et al. (2014) | USA, Western University of Health Sciences | A four-year formal mentorship program | 51 pharmacy faculty mentor-protégé' pairs | Scholar and researcher                   | One group, Pretest-posttest | Non-significant improvements in the protégés' number of grant submissions,                                                                                                                                                                                                           | √ |  |  | √ |  |  | 11 |

|                          |                                |                                                             |                                                                                                                       |                                                                                            |                                                |                                                                                                                                                                                             |   |  |   |   |   |   |      |
|--------------------------|--------------------------------|-------------------------------------------------------------|-----------------------------------------------------------------------------------------------------------------------|--------------------------------------------------------------------------------------------|------------------------------------------------|---------------------------------------------------------------------------------------------------------------------------------------------------------------------------------------------|---|--|---|---|---|---|------|
|                          |                                |                                                             |                                                                                                                       |                                                                                            |                                                | retention rates, or success in promotion/tenure; significant increases in the total number of peer-reviewed publications for junior faculty protégés.                                       |   |  |   |   |   |   |      |
| Batsche & Monoson (1993) | USA, Illinois State University | A 17-month four-phase multidisciplinary faculty development | 10 faculty members in the areas of social services, human performance, psychology, nutrition, audiology, and nursing. | Information provider and coach-Curriculum developer and implementer-Scholar and researcher | Non-equivalent control group, Pretest-posttest | Significant increases in faculty knowledge in the field of aging; significant gains in students' knowledge in gerontological concepts; 10 faculty members developed 50 instructional Units. |   |  | √ | √ | √ | √ | 13.5 |
| Taylor &                 | USA, St. Louis                 | A year-long Pharmacy                                        | 21 new                                                                                                                | Professional                                                                               | One group,                                     | More highly engaged and                                                                                                                                                                     | √ |  |   | √ |   |   | 11.5 |

|                         |                                           |                                                                     |                                                                                                  |                                      |                                                |                                                                                                                           |   |   |  |   |  |  |      |
|-------------------------|-------------------------------------------|---------------------------------------------------------------------|--------------------------------------------------------------------------------------------------|--------------------------------------|------------------------------------------------|---------------------------------------------------------------------------------------------------------------------------|---|---|--|---|--|--|------|
| Berry (2008)            | College of Pharmacy                       | Faculty Academy                                                     | pharmacy faculty members                                                                         |                                      | Pretest-posttest                               | productive faculty members who were more likely to remain long term within the college.                                   |   |   |  |   |  |  |      |
| Johansson et al. (2012) | Sweden, Uppsala University Hospital       | 14-hour Stanford faculty development programme over a 7-week period | 48 physicians from different departments                                                         | Information provider and coach       | Randomised controlled study, Pretest-posttest  | Positive changes in teaching behaviors as assessed by the participants' self-ratings.                                     | √ |   |  | √ |  |  | 12   |
| Windish et al. (2007)   | USA, Johns Hopkins Bayview Medical Center | A 10-month longitudinal mentored faculty development program        | 138 faculty and fellows from Johns Hopkins and other institutions and 63 matched nonparticipants | Curriculum developer and implementer | Non-equivalent control group, Pretest-posttest | Improvement in self-assessed curricular development, implementation, and evaluation skills and enjoyment of participants. | √ |   |  | √ |  |  | 14   |
| Lee et al. (2012)       | USA, University of California             | A 4-month Web-based train-the-trainer program                       | 58 pharmacy faculty trainers                                                                     | Information provider and coach       | One group, Pretest-posttest                    | Significant increases in instructors' self-reported ability to teach                                                      | √ | √ |  | √ |  |  | 11.5 |

|                     |                                       |                                                                          |                                  |                                                                                              |                                                |                                                                                                                                                                                                                                      |  |   |   |   |   |  |      |
|---------------------|---------------------------------------|--------------------------------------------------------------------------|----------------------------------|----------------------------------------------------------------------------------------------|------------------------------------------------|--------------------------------------------------------------------------------------------------------------------------------------------------------------------------------------------------------------------------------------|--|---|---|---|---|--|------|
|                     |                                       |                                                                          |                                  |                                                                                              |                                                | pharmacogenomics to pharmacy students                                                                                                                                                                                                |  |   |   |   |   |  |      |
| Green (2005)        | USA, seven podiatric medical colleges | A 2-day workshop                                                         | 10 academic podiatric physicians | Information provider and coach- Curriculum developer and implementer- Scholar and researcher | One group, Pretest-posttest, delayed post-test | Improvement in participants' self-reported EBM practice and EBM teaching skills and, within 3 months, fully or partially implemented many changes in their clinical practice, podiatric medical teaching, and administrative duties. |  | √ | √ | √ | √ |  | 12.5 |
| Smith et al. (2018) | USA, Long Island Jewish Forest Hills  | Three OSTE simulation sessions lasting about 2.5 h over a 2-month period | 29 attending physicians          | Information provider and coach                                                               | One group, Pretest-posttest, delayed post-test | Non-significant increases in 'intern' OSTE ratings of attendings and attending self-assessment ratings and                                                                                                                           |  |   | √ |   |   |  | 13   |

|                       |                                                |                                                                                                               |                                                                                            |                                                                          |                             | resident evaluations of attendings.                                                                                                               |   |   |   |  |  |  |     |
|-----------------------|------------------------------------------------|---------------------------------------------------------------------------------------------------------------|--------------------------------------------------------------------------------------------|--------------------------------------------------------------------------|-----------------------------|---------------------------------------------------------------------------------------------------------------------------------------------------|---|---|---|--|--|--|-----|
| Gjerde et al. (2004)  | USA, University of Wisconsin                   | A year-long series of five weekend workshops over 6 years (A six-year faculty development fellowship program) | 84 clinical teachers in family medicine, general pediatrics, and general internal medicine | Information provider and coach-Manager and leader-Scholar and researcher | One group, Pretest-posttest | Significant improvement in participants' self-reported EBM skills, teaching skills, technology/informatics skills and leadership/advocacy skills. | √ |   | √ |  |  |  | 10  |
| Sabato et al. (2017)  | USA, Rutgers School of Dental Medicine         | The two-year program with weekly meetings                                                                     | 35 dental faculty members                                                                  | Information provider and coach-Manager and leader                        | 4 cohort, Pretest-posttest  | Significant increases in participants' perception of preparedness in administrative, clinical, and educational competencies.                      | √ |   | √ |  |  |  | 9.5 |
| LeBlanc et al. (2007) | USA, Ohio State University College of Pharmacy | A 2-part training seminar includes 42 credit hours of online                                                  | 22 pharmacy instructors                                                                    | Information provider and coach-Facilitator of learning and mentor        | One group, Pretest-posttest | Significant increases in level of comfort in their ability to facilitate online case-                                                             | √ | √ |   |  |  |  | 9.5 |

|                             |                                                           |                                                                                    |                                                                                               |                                                                    |                                                                    |                                                                                                                                                                                                                                                                                                                                |   |  |   |   |  |  |  |      |
|-----------------------------|-----------------------------------------------------------|------------------------------------------------------------------------------------|-----------------------------------------------------------------------------------------------|--------------------------------------------------------------------|--------------------------------------------------------------------|--------------------------------------------------------------------------------------------------------------------------------------------------------------------------------------------------------------------------------------------------------------------------------------------------------------------------------|---|--|---|---|--|--|--|------|
|                             |                                                           | didactic<br>course work                                                            |                                                                                               |                                                                    |                                                                    | based<br>discussions.                                                                                                                                                                                                                                                                                                          |   |  |   |   |  |  |  |      |
| Manwell<br>et al.<br>(2006) | Six<br>universities<br>throughout<br>the United<br>States | Two 2-day<br>skills-based<br>courses held<br>6 months<br>apart                     | 153<br>faculty from<br>multiple<br>disciplines<br>at 6<br>locations                           | Information<br>provider and<br>coach-<br>Scholar and<br>researcher | One<br>group,<br>Pretest-<br>posttest,<br>delayed<br>post-<br>test | Significant<br>improvements<br>in the<br>teaching,<br>clinical, and<br>research<br>activities of<br>faculty;<br>increases in<br>number of<br>professional<br>activities in<br>the alcohol<br>area;<br>significant<br>improvements<br>in screening,<br>brief<br>intervention,<br>and<br>motivational<br>interviewing<br>skills. | √ |  | √ | √ |  |  |  | 12.5 |
| Koffel<br>& Reidt<br>(2015) | USA,<br>University<br>of<br>Minnesota                     | The two-day<br>interprofessi<br>onal<br>evidence-<br>based<br>practice<br>workshop | 25<br>faculty<br>from the<br>schools and<br>colleges of<br>Medicine,<br>Nursing,<br>Pharmacy, | Information<br>provider and<br>coach-<br>Scholar and<br>researcher | One<br>group,<br>Pretest-<br>posttest,<br>delayed<br>post-<br>test | Significant<br>improvements<br>in faculty<br>members'<br>self-reported<br>confidence<br>and ability to<br>practice and                                                                                                                                                                                                         | √ |  | √ |   |  |  |  | 10.5 |



|                            |                                                               |                                                                   |                                                                                                      |                                            |                                       |                                                                                                                                                                                      |   |   |   |   |  |  |     |
|----------------------------|---------------------------------------------------------------|-------------------------------------------------------------------|------------------------------------------------------------------------------------------------------|--------------------------------------------|---------------------------------------|--------------------------------------------------------------------------------------------------------------------------------------------------------------------------------------|---|---|---|---|--|--|-----|
|                            |                                                               |                                                                   | Dentistry,<br>and<br>Veterinary<br>Medicine<br>and the<br>Center for<br>Allied<br>Health<br>Programs |                                            |                                       | teach core<br>EBP skills.                                                                                                                                                            |   |   |   |   |  |  |     |
| Sturpe<br>et al.<br>(2013) | USA,<br>University<br>of<br>Maryland<br>School of<br>Pharmacy | A two-<br>station OSTE                                            | 14<br>faculty/resid<br>ents                                                                          | Information<br>provider and<br>coach       | One<br>group,<br>Pretest-<br>posttest | Most<br>participants<br>scored well on<br>the<br>standardized<br>checklist<br>items; all<br>participants<br>agreed the<br>debriefing<br>session was<br>useful.                       | √ |   | √ |   |  |  | 11  |
| Brown<br>et al.<br>(2016)  | Canada,<br>University<br>of<br>Calgary                        | The four<br>three-hour<br>orientations<br>to wellness<br>workshop | 47<br>new faculty<br>of medicine<br>members                                                          | Scholar and<br>researcher-<br>Professional | One<br>group,<br>Pretest-<br>posttest | Significant<br>increases in<br>post workshop<br>self-efficacy<br>scores<br>compared to<br>pre workshop<br>ratings; most<br>participants<br>expressed<br>intention to<br>change their | √ | √ | √ | √ |  |  | 9.5 |

|                          |                                                          |                                                                                                            |                                                 |                                                                                                                   |                                                               |                                                                                                                                                                                         |   |   |   |   |   |  |    |
|--------------------------|----------------------------------------------------------|------------------------------------------------------------------------------------------------------------|-------------------------------------------------|-------------------------------------------------------------------------------------------------------------------|---------------------------------------------------------------|-----------------------------------------------------------------------------------------------------------------------------------------------------------------------------------------|---|---|---|---|---|--|----|
|                          |                                                          |                                                                                                            |                                                 |                                                                                                                   |                                                               | behavior as a result of participating in the workshop.                                                                                                                                  |   |   |   |   |   |  |    |
| Roberts & Devries (2004) | USA, Institutions with community-based teaching programs | A series of three 2-day “Train the Trainer” workshops was spread over 12 months                            | 42 academicians and practitioners               | Information provider and coach-Facilitator of learning and mentor-Assessor and diagnostician - Manager and leader | 2 cohort, Pretest-posttest                                    | Significant improvement in participants’ self-reported knowledge, skills, and attitudes to recruit and retain community-based preceptors and increases in multiple areas of competence. | √ | √ | √ | √ | √ |  | 12 |
| Ebrahimi & Kojuri (2012) | Iran, Shiraz University of Medical Sciences              | A series of faculty empowerment workshops as one month medical education programs, four times per academic | 219 basic science and clinical science teachers | Information provider and coach-Facilitator of learning and mentor-Assessor and diagnostician - Manager and leader | Equivalent control group, Pretest-posttest, delayed post-test | Significant positive effect on medical teachers’ competencies; significant improvements in the participants’ teaching abilities.                                                        | √ | √ | √ | √ |   |  | 12 |

| year                   |                                                       |                                                                                                                              |                                               |                                              |                                                |                                                                                                                                                                                                                     |   |   |   |   |  |  |      |
|------------------------|-------------------------------------------------------|------------------------------------------------------------------------------------------------------------------------------|-----------------------------------------------|----------------------------------------------|------------------------------------------------|---------------------------------------------------------------------------------------------------------------------------------------------------------------------------------------------------------------------|---|---|---|---|--|--|------|
| Shealy et al. (2019)   | USA, University of South Carolina College of Pharmacy | The two-hour training and one-hour active-learning sessions of Birkman Method Faculty and Preceptor Development Intervention | 38 pharmacy faculty members and 51 preceptors | Information provider and coach- Professional | One group, Pretest-posttest, delayed post-test | Significant improvement in participants' self-reported self-awareness and self-confidence related to coaching; significant changes in self-perception in usual communication style and behavior style under stress. | √ | √ | √ |   |  |  | 12.5 |
| Willett (2006)         | USA, UMDNJ-Robert Wood Johnson Medical School         | The 20-min faculty development audiotape                                                                                     | 53 academic and community preceptors          | Information provider and coach               | One group, Pretest-posttest, delayed post-test | Improvement in participants' teaching technique; change in shadowing behavior of preceptors.                                                                                                                        |   |   |   | √ |  |  | 11.5 |
| Yanamada et al. (2016) | USA, Duke University School of                        | 6-month-long quality improvement (QI) course                                                                                 | 8 faculty members from the                    | Manager and leader                           | One group, Pretest-posttest                    | Significant changes in participants' QI knowledge                                                                                                                                                                   | √ | √ | √ | √ |  |  | 13.5 |

| Medicine                |                                                               | Department of Medicine                                                               |                                                                    |                                                                   | and self-assessed confidence on key QI concepts.          |                                                                                                                            |   |   |   |   |  |      |
|-------------------------|---------------------------------------------------------------|--------------------------------------------------------------------------------------|--------------------------------------------------------------------|-------------------------------------------------------------------|-----------------------------------------------------------|----------------------------------------------------------------------------------------------------------------------------|---|---|---|---|--|------|
| Johansson et al. (2009) | Sweden, Uppsala University Hospital                           | Five series of 7-week faculty development seminar                                    | 40 physicians from different departments                           | Information provider and coach                                    | One group, Pretest-posttest                               | Significant increases in participants' teaching skills; positive changes in their teaching behaviours.                     | √ | √ | √ | √ |  | 9.5  |
| Lye et al. (1998)       | USA, Medical College of Wisconsin                             | Seven 1-hour conferences (A Case-Oriented Faculty Development Program)               | 101 pediatric faculty attending                                    | Information provider and coach-Facilitator of learning and mentor | Non-equivalent control group, Pretest-posttest            | Significant improvement in both feedback and overall teaching effectiveness of faculty attending clinical teaching rounds. |   |   | √ |   |  | 11.5 |
| Lang et al. (2012)      | USA, University of Rochester School of Medicine and Dentistry | Monthly 1-hour interactive workshop on collaborative development of teaching scripts | 22 internal medicine, or combined internal medicine and pediatrics | Information provider and coach-Professional                       | One group, Pretest-posttest, qualitative content analysis | No significant differences in quantity or applicability of teaching; significant improvement in faculty self-              | √ | √ |   | √ |  | 10.5 |

|                        |                                                                |                                                                                           |                           |                                |                                                |                                                                                                                                         |   |  |   |  |  |  |      |
|------------------------|----------------------------------------------------------------|-------------------------------------------------------------------------------------------|---------------------------|--------------------------------|------------------------------------------------|-----------------------------------------------------------------------------------------------------------------------------------------|---|--|---|--|--|--|------|
|                        |                                                                |                                                                                           |                           |                                |                                                | efficacy with teaching.                                                                                                                 |   |  |   |  |  |  |      |
| Tenzin et al. (2017)   | Bhutan, Khesar Gyalpo University of Medical Sciences of Bhutan | A 2 hours long workshop on construction of MCQs                                           | 16 intern medical doctors | Assessor and diagnostician     | Quasi-experimental study                       | Effective changes in the learning and performances of medical educators in the development of MCQs.                                     |   |  | √ |  |  |  | 12.5 |
| McAndrew et al. (2012) | USA, New York University College of Dentistry                  | Three-station OSTE                                                                        | 12 faculty members        | Information provider and coach | 2 cohort, Pretest-posttest                     | Significant changes in faculty participants' OSTE scores and ratings; significant improvements in nine of the fifteen teaching domains. | √ |  | √ |  |  |  | 12.5 |
| Wong & Agisheva (2004) | Russia, Kazan State Medical University                         | Four seminars based on the 7 categories of the Stanford Faculty Development Program model | 14 medical teachers       | Information provider and coach | One group, Pretest-posttest, delayed post-test | Significant improvements in the ratings of global teaching performance and specific teaching behaviors at both measured                 | √ |  | √ |  |  |  | 10   |

|                        |                                                        |                                                                                                               |                                                                 |                                                                                |                                                |                                                                                                                                                                    |   |   |   |   |   |  |      |
|------------------------|--------------------------------------------------------|---------------------------------------------------------------------------------------------------------------|-----------------------------------------------------------------|--------------------------------------------------------------------------------|------------------------------------------------|--------------------------------------------------------------------------------------------------------------------------------------------------------------------|---|---|---|---|---|--|------|
|                        |                                                        |                                                                                                               |                                                                 |                                                                                |                                                | times.                                                                                                                                                             |   |   |   |   |   |  |      |
| Wong et al. (2017)     | Japan, University of Tokyo Graduate School of Medicine | Two complete series of the seven 2-hour seminars was spread over 4 months                                     | 19 nurse and physician educators                                | Information provider and coach                                                 | One group, Pretest-posttest, delayed post-test | Significant improvements in participants' self-reported teaching abilities at both the posttest and at 1 year.                                                     |   |   | √ |   |   |  | 10   |
| Paige et al. (2015)    | USA, Association for Surgical Education                | A train the trainer workshop with 2 separate 90-minutes sessions                                              | ----                                                            | Information provider and coach                                                 | One group, Pretest-posttest, delayed post-test | Significant improvements in participants' self-efficacy in objectives-driven aspects of debriefing.                                                                | √ | √ |   |   |   |  | 9.5  |
| Sullivan et al. (2006) | USA, Harvard Medical School                            | Two-week program offered annually (2000 to 2003) with 2 on-site sessions and 6-month distance-learning period | 156 physician and nurse educators from North America and Europe | Information provider and coach-Facilitator of learning and mentor-Professional | 4 cohort, Pretest-posttest, delayed post-test  | Increases in: time spent in palliative care practice, use of learner-centered teaching approaches and palliative care topics taught; improvements in participants' | √ | √ | √ | √ | √ |  | 13.5 |

|                       |                                          |                                                                         |                                                       |                                                                                |                                                 |                                                                                                                                                                    |   |   |   |   |   |  |    |
|-----------------------|------------------------------------------|-------------------------------------------------------------------------|-------------------------------------------------------|--------------------------------------------------------------------------------|-------------------------------------------------|--------------------------------------------------------------------------------------------------------------------------------------------------------------------|---|---|---|---|---|--|----|
|                       |                                          |                                                                         |                                                       |                                                                                |                                                 | self-reported clinical practices in psychosocial dimensions of care; major improvements in confidence, commitment to palliative care, and enthusiasm for teaching. |   |   |   |   |   |  |    |
| Sigalet et al. (2016) | Qatar, Sidra Medical and Research Center | A two day interprofessional simulation based faculty development course | 41 clinicians                                         | Information provider and coach-Facilitator of learning and mentor-Professional | One group, Pretest-posttest                     | Significant improvements in aggregate MCQ scores from pre- to post-test; non-significant improvements in participants' ability to apply the theory of feedback.    |   |   | √ |   |   |  | 12 |
| Rao et al. (2017)     | USA, Partners HealthCare                 | A 6-day interdisciplinary, team-based quality improvement leadership    | 13 cohorts consisting of a total of 239 teams and 516 | Manager and leader                                                             | 13 cohorts, Pretest-posttest, delayed post-test | Improvements in participants' self-reported understanding of QI                                                                                                    | √ | √ | √ | √ | √ |  | 11 |

|                        |                                        |                                                                                                 |                                                                    |                                                                                                                                           |                                                |                                                                                                                                                                                   |   |   |   |   |   |  |      |
|------------------------|----------------------------------------|-------------------------------------------------------------------------------------------------|--------------------------------------------------------------------|-------------------------------------------------------------------------------------------------------------------------------------------|------------------------------------------------|-----------------------------------------------------------------------------------------------------------------------------------------------------------------------------------|---|---|---|---|---|--|------|
|                        |                                        | training program over a period of 4 months                                                      | physicians, registered nurses, other clinicians and administrators |                                                                                                                                           |                                                | concepts.                                                                                                                                                                         |   |   |   |   |   |  |      |
| Roos et al. (2014)     | Germany, Heidelberg Medical Faculty    | A 5-day teaching education program                                                              | 56 medical educators                                               | Information provider and coach-Facilitator of learning and mentor-Assessor and diagnostician - Manager and leader-Role model-Professional | One group, Pretest-posttest, delayed post-test | Significant increases in participants' knowledge; improvements in participants' teaching performance ratings, transfer of learning into teaching performance by the participants. | √ | √ | √ | √ | √ |  | 12.5 |
| Wong & Agisheva (2007) | Russia, Kazan State Medical University | Five small-group seminars based on the 7 categories of the Stanford Faculty Development Program | 48 faculty members from 17 different academic departments          | Information provider and coach                                                                                                            | One group, Pretest-posttest, delayed post-test | Significant improvements in the ratings of global teaching performance and specific teaching behaviors at both measured                                                           | √ |   | √ | √ |   |  | 10.5 |



|                        |                                                 | model                                                                              |                                         |                                                                   |                                                | times.                                                                                                                                                                        |   |   |   |   |  |  |      |
|------------------------|-------------------------------------------------|------------------------------------------------------------------------------------|-----------------------------------------|-------------------------------------------------------------------|------------------------------------------------|-------------------------------------------------------------------------------------------------------------------------------------------------------------------------------|---|---|---|---|--|--|------|
| Liao et al. (2013)     | Taiwan, Chang Gung University                   | A two-hour mini-CEX workshop                                                       | 49 trainers of different subspecialties | Facilitator of learning and mentor-Assessor and diagnostician     | One group, Pretest-posttest                    | Significant improvements in participants' cognitive knowledge; enhancement of giving feedback to residents.                                                                   | √ |   | √ | √ |  |  | 11.5 |
| Arnett et al. (2017)   | USA, University of Michigan School of Dentistry | A five-hour workshop                                                               | 16 dental hygiene faculty members       | Information provider and coach-Facilitator of learning and mentor | One group, Pretest-posttest, delayed post-test | Increases in dental hygiene faculty members' appreciation of the value of motivational interviewing and confidence in teaching it to students immediately after the workshop. |   | √ | √ |   |  |  | 12   |
| Register et al. (2019) | USA, University of Alabama at Birmingham        | A five-hour standard and intensive interprofessional faculty development course in | 51 faculty from multiple schools        | Role model-Professional                                           | Mixed methodology, Non-equivalent control      | Better retention of positive interprofessional perceptions in the intensive                                                                                                   |   | √ |   |   |  |  | 10   |

|                         |                                                  |                                                        |                                                                                |                                                                                              |                                                         |                                                                                                   |   |   |   |  |  |  |     |
|-------------------------|--------------------------------------------------|--------------------------------------------------------|--------------------------------------------------------------------------------|----------------------------------------------------------------------------------------------|---------------------------------------------------------|---------------------------------------------------------------------------------------------------|---|---|---|--|--|--|-----|
|                         |                                                  | simulation                                             |                                                                                |                                                                                              | group, Pretest-posttest, delayed post-test              | training group; gradual decline in positive interprofessional perceptions in all groups.          |   |   |   |  |  |  |     |
| Baral et al. (2015)     | Nepal, B.P. Koirala Institute of Health Sciences | 2 two and a half day teacher-training workshops        | 31 faculty members from the departments of basic, clinical and allied sciences | Information provider and coach-Facilitator of learning and mentor-Assessor and diagnostician | One group, Pretest-posttest                             | Improvement in participants' knowledge on different aspects of medical education.                 | √ | √ | √ |  |  |  | 10  |
| John et al. (2016)      | India, Medical College in Kochi                  | Eight-hour training curriculum in teaching methodology | 30 entry level medical teachers                                                | Scholar and researcher                                                                       | Quasi-experimental study with pre-test post-test design | Significant improvements in participants' scores for knowledge, motivation to teach and practice. | √ | √ | √ |  |  |  | 9.5 |
| Mokkapati & Mada (2018) | India, Apollo Institute of Medical Sciences      | A two day teacher training workshop                    | 29 faculty members                                                             | Information provider and coach-Facilitator of learning and mentor-                           | One group, Pretest-posttest                             | Significant improvements in knowledge of the participants after the                               |   |   | √ |  |  |  | 11  |

|                             |                                                                     |                                                                                                                |                             |                                                                                                             |                             |                                                                                                                                                                                                                                      |   |   |   |   |  |  |      |
|-----------------------------|---------------------------------------------------------------------|----------------------------------------------------------------------------------------------------------------|-----------------------------|-------------------------------------------------------------------------------------------------------------|-----------------------------|--------------------------------------------------------------------------------------------------------------------------------------------------------------------------------------------------------------------------------------|---|---|---|---|--|--|------|
|                             | and Research                                                        |                                                                                                                |                             | Assessor and diagnostician                                                                                  |                             | workshop.                                                                                                                                                                                                                            |   |   |   |   |  |  |      |
| Popovich et al. (2006)      | USA, University of Illinois College of Pharmacy                     | Weekly 60–90-minute conversation forums                                                                        | 11 pharmacy faculty members | Information provider and coach-Facilitator of learning and mentor-Assessor and diagnostician - Professional | One group, Pretest-posttest | Significant self-perceived improvement from pretest to posttest.                                                                                                                                                                     | √ | √ | √ |   |  |  | 10   |
| Griffeth & Wiederman (2018) | USA, The University of South Carolina School of Medicine Greenville | 60 minutes in total, divided over two training sessions embedded within the monthly hour-long faculty meeting. | 33 faculty members          | Assessor and diagnostician                                                                                  | One group, Pretest-posttest | Statistically significant differences in both the self-rated confidence of faculty members in their ability to accurately rate student performance and in the actual clinical assessment ratings of students after the intervention. | √ | √ | √ | √ |  |  | 11.5 |
| Sánchez -                   | Mexico, UNAM                                                        | A monthly one-hour                                                                                             | 22 participants,            | Assessor and diagnostician                                                                                  | Quasi-experi                | Improvement in self-                                                                                                                                                                                                                 | √ | √ | √ | √ |  |  | 11   |

|                          |                                                                    |                                                                                                  |                                                                   |                                                                                                       |                                                                |                                                                                                                                                |   |   |   |   |  |  |  |      |
|--------------------------|--------------------------------------------------------------------|--------------------------------------------------------------------------------------------------|-------------------------------------------------------------------|-------------------------------------------------------------------------------------------------------|----------------------------------------------------------------|------------------------------------------------------------------------------------------------------------------------------------------------|---|---|---|---|--|--|--|------|
| Mendiola et al. (2015)   | Faculty of Medicine in Mexico City.                                | medical education Journal Club                                                                   | a mix of clinicians, educators, psychologists and one sociologist | - Scholar and researcher                                                                              | mental study with pre-test post-test design                    | reported competencies in medical education literature critical appraisal and behaviors related to the use of evidence in educational practice. |   |   |   |   |  |  |  |      |
| Haines & Popovich (2014) | USA, the Palm Beach Atlantic University Gregory School of Pharmacy | A nontraditional external faculty mentor program (monthly sessions and 2 annual summer retreats) | 13 junior/mid-career clinical faculty members                     | Information provider and coach-Facilitator of learning and mentor-Scholar and researcher-Professional | One group, Pretest-posttest                                    | Improvements in meeting faculty needs related to professional development, individual feedback, career development.                            | √ | √ | √ |   |  |  |  | 9    |
| Sherbin et al. (2006)    | Canada, University of Toronto                                      | A novel one-day evidence-based, skills-oriented faculty development course                       | 31 individuals from a variety of academic and community EDs       | Information provider and coach                                                                        | Mixed methodology , One group, Pretest-posttest, delayed post- | Improvements in participants' knowledge about ED-specific teaching strategies, and this                                                        | √ | √ | √ | √ |  |  |  | 13.5 |

|                       |                                             |                                                                                                   |                                                                 |                                                                                                                                    | test                         | improvement is maintained at one month.                                           |   |   |   |   |  |  |      |
|-----------------------|---------------------------------------------|---------------------------------------------------------------------------------------------------|-----------------------------------------------------------------|------------------------------------------------------------------------------------------------------------------------------------|------------------------------|-----------------------------------------------------------------------------------|---|---|---|---|--|--|------|
| Mitcham et al. (2002) | USA, Medical University of South Carolina   | 10 occupational therapy faculty development workshops                                             | 179 occupational therapy faculty participants                   | Information provider and coach-Facilitator of learning and mentor-Assessor and diagnostician - Scholar and researcher-Professional | 10 cohorts, Pretest-posttest | Changes in participants' current teaching practices.                              | √ | √ |   | √ |  |  | 8.5  |
| Bigby & Barnes (1993) | USA, Brigham and Women's Hospital           | A learner-centered, largely experiential faculty development program in substance abuse education | 87 general internal medicine faculty from academic institutions | Information provider and coach                                                                                                     | One group, Pretest-posttest  | Changes in participants' knowledge, attitudes, and confidence in clinical skills. |   | √ | √ | √ |  |  | 12.5 |
| Skeff et al. (1992)   | USA, Stanford University School of Medicine | One-month faculty development program based on the 7 categories of the Stanford Faculty           | 29 clinical faculty members                                     | Information provider and coach-Facilitator of learning and mentor-Assessor and diagnostician - Manager                             | One group, Pretest-posttest  | Significant changes in participants' teaching performance and attitudes.          | √ | √ | √ | √ |  |  | 11.5 |

|                      |                                         | Development Program model                              |                                                                      | and leader                                                |                                                                   |                                                                                                          |   |   |   |   |  |  |      |
|----------------------|-----------------------------------------|--------------------------------------------------------|----------------------------------------------------------------------|-----------------------------------------------------------|-------------------------------------------------------------------|----------------------------------------------------------------------------------------------------------|---|---|---|---|--|--|------|
| Assemi et al. (2007) | USA, schools across the United States   | A 2-day cultural competence train-the-trainer workshop | 50 pharmacy educators                                                | Information provider and coach                            | One group, Pretest-posttest, delayed post-test                    | Significant increases in faculty members' perceived and documented ability to teach cultural competence. | √ | √ | √ | √ |  |  | 10.5 |
| Quirk et al. (1998)  | USA, Different regions of United States | Five national series of faculty development workshops  | 223 community health center preceptors from a variety of disciplines | Information provider and coach-Assessor and diagnostician | One group, Pretest-posttest, delayed post-test                    | Significant increases in the teaching knowledge and skills and use of effective teaching behaviors.      | √ | √ | √ | √ |  |  | 12.5 |
| Lye et al. (2003)    | USA, Medical College of Wisconsin       | A monthly faculty development program                  | 7 experienced clinical educators                                     | Information provider and coach                            | Non-equivalent control group, Pretest-posttest, delayed post-test | Significant increases in participants' use of 2 teaching methods (priming and feedback).                 |   |   | √ | √ |  |  | 12   |
| Baker et al. (2010)  | Canada, University of                   | Five 1-day face-to-face sessions                       | 32 participants, a mix of                                            | Facilitator of learning and mentor-                       | One group, Pretest-                                               | Significant improvements in the areas of                                                                 |   | √ | √ |   |  |  | 9    |

|                       |                               |                                                            |                                                                                                                 |                                                                                                                                |                                                |                                                                                                                                                                                                                                  |   |   |   |   |  |  |  |    |
|-----------------------|-------------------------------|------------------------------------------------------------|-----------------------------------------------------------------------------------------------------------------|--------------------------------------------------------------------------------------------------------------------------------|------------------------------------------------|----------------------------------------------------------------------------------------------------------------------------------------------------------------------------------------------------------------------------------|---|---|---|---|--|--|--|----|
|                       | Toronto                       | spread over three months (IPE faculty development program) | professions, including medicine, nursing, pharmacy, physical therapy, speech-language pathology and social work | Professional                                                                                                                   | posttest                                       | knowledge, skills, community, and feelings of success and confidence about the principles of IPE and faculty development.                                                                                                        |   |   |   |   |  |  |  |    |
| Moore & Pinsky (2015) | USA, University of Pittsburgh | 22 broad-based career development course sessions          | 12 critical care faculty and 1 non-critical care faculty                                                        | Curriculum developer and implementer-Facilitator of learning and mentor-Scholar and researcher-Professional-Manager and leader | One group, Pretest-posttest, delayed post-test | General increase in comfort scores between precourse and postcourse surveys and the maintenance of these scores for set of administrative, educational, research, and other professional development skills at 3-year follow-up. | √ | √ | √ |   |  |  |  | 7  |
| Mookherjee et         | USA, University               | A year-long peer                                           | 22 attending                                                                                                    | Information provider and                                                                                                       | One group,                                     | Significant increases in                                                                                                                                                                                                         | √ | √ | √ | √ |  |  |  | 10 |

|                             |                                                                            |                                                                                                                                          |                                                                          |                                                                                                                                                                                                                                        |                                                                    |                                                                                                                                                                                                                          |   |   |   |   |  |  |  |      |
|-----------------------------|----------------------------------------------------------------------------|------------------------------------------------------------------------------------------------------------------------------------------|--------------------------------------------------------------------------|----------------------------------------------------------------------------------------------------------------------------------------------------------------------------------------------------------------------------------------|--------------------------------------------------------------------|--------------------------------------------------------------------------------------------------------------------------------------------------------------------------------------------------------------------------|---|---|---|---|--|--|--|------|
| al.<br>(2014)               | of<br>California                                                           | observation,<br>assessment,<br>and feedback<br>program                                                                                   | hospitalists                                                             | coach-<br>Facilitator of<br>learning and<br>mentor-<br>Assessor and<br>diagnostician                                                                                                                                                   | Pretest-<br>posttest                                               | hospitalist<br>confidence in<br>giving<br>feedback,<br>receiving<br>feedback, and<br>teaching<br>efficacy.                                                                                                               |   |   |   |   |  |  |  |      |
| Gardner<br>et al.<br>(2019) | USA,<br>University<br>of<br>Texas<br>Southwest<br>ern<br>Medical<br>Center | A 4-hour<br>intraoperativ<br>e teaching<br>course                                                                                        | 19<br>faculty<br>members<br>from the<br>general<br>surgery<br>department | Information<br>provider and<br>coach-<br>Facilitator of<br>learning and<br>mentor-<br>Assessor and<br>diagnostician                                                                                                                    | One<br>group,<br>Pretest-<br>posttest,<br>delayed<br>post-<br>test | Resident-<br>perceived<br>improvement<br>in structured<br>teaching<br>behavior<br>among<br>participating<br>faculty.                                                                                                     | √ |   |   | √ |  |  |  | 11.5 |
| Gates et<br>al.<br>(2013)   | USA,<br>Bronx-<br>Lebanon<br>Hospital<br>Center                            | A four-phase<br>program<br>comprising<br>twelve days<br>of seminars<br>(three days<br>per phase<br>at seven<br>contact hours<br>per day) | 15<br>dental<br>education<br>faculty<br>members                          | Information<br>provider and<br>coach-<br>Facilitator of<br>learning and<br>mentor-<br>Assessor and<br>diagnostician<br>- Curriculum<br>developer<br>and<br>implementer<br>- Scholar and<br>researcher-<br>Professional-<br>Manager and | One<br>group,<br>Pretest-<br>posttest                              | Significant<br>changes in<br>participants'<br>knowledge<br>and<br>confidence for<br>a wide range<br>of academic<br>skills in the<br>realms of<br>learning<br>theory,<br>teaching<br>strategies,<br>curriculum<br>design, | √ | √ | √ |   |  |  |  | 12   |



|                       |                                                        |                                                                                                            |                                                                                    |                                                                                                                                |                                                |                                                                                                                                      |   |   |   |   |  |  |      |
|-----------------------|--------------------------------------------------------|------------------------------------------------------------------------------------------------------------|------------------------------------------------------------------------------------|--------------------------------------------------------------------------------------------------------------------------------|------------------------------------------------|--------------------------------------------------------------------------------------------------------------------------------------|---|---|---|---|--|--|------|
|                       |                                                        |                                                                                                            |                                                                                    | leader                                                                                                                         |                                                | assessment of students' learning, educational leadership, scholarship, and career development.                                       |   |   |   |   |  |  |      |
| Wong et al. (2004)    | USA, American Society of Addiction Medicine            | A 1-day faculty development workshop                                                                       | 26 faculty small group facilitators                                                | Information provider and coach-Facilitator of learning and mentor                                                              | One group, Pretest-posttest                    | Significant improvements in participants' small-group teaching skills.                                                               | √ |   | √ |   |  |  | 10   |
| Cole et al. (2004)    | USA, Johns Hopkins University, School of Medicine      | An intensive (3.5 hours weekly), longitudinal (nine months) faculty development program in teaching skills | 228 Clinician–Educators (100 program participants and 128 program nonparticipants) | Information provider and coach-Facilitator of learning and mentor-Assessor and diagnostician - Professional-Manager and leader | Non-equivalent control group, Pretest-posttest | Significant changes in participants' self-assessed teaching and professional skills, teaching enjoyment, and learning effectiveness. | √ | √ | √ | √ |  |  | 11   |
| Salerno et al. (2002) | USA, Ambulatory internal medicine clinic in a tertiary | Three 90-minute faculty development seminars based on the                                                  | 9 board-certified internist faculty preceptors                                     | Information provider and coach-Facilitator of learning and mentor-                                                             | Mixed methodology, One group,                  | Significant improvements in the quality of verbal feedback delivered in                                                              | √ |   | √ | √ |  |  | 12.5 |

|                        | care medical center         | One-Minute Preceptor teaching model      | and 44 third-year medical students | Assessor and diagnostician                                | Pretest-posttest                                                         | the ambulatory setting.                                                                                                                                                                                                                                                                                                                         |   |   |   |   |   |   |    |
|------------------------|-----------------------------|------------------------------------------|------------------------------------|-----------------------------------------------------------|--------------------------------------------------------------------------|-------------------------------------------------------------------------------------------------------------------------------------------------------------------------------------------------------------------------------------------------------------------------------------------------------------------------------------------------|---|---|---|---|---|---|----|
| Christie et al. (2007) | USA, Idaho State University | A four-hour faculty development workshop | 14 clinical faculty members        | Information provider and coach-Assessor and diagnostician | Mixed methodology , Three cohorts , Pretest-posttest , delayed post-test | The clinical faculty's evaluation of professional judgment during patient care was enhanced by training; written comments more frequently related to core values defined in the ADHA code of ethics; students were more positive in outcomes assessments about their competency and learning experiences related to professionalism and ethics. | √ | √ | √ | √ | √ | √ | 13 |
| Delver                 | Canada,                     | The 90-min                               | 13                                 | Information                                               | Mixed                                                                    | Significant                                                                                                                                                                                                                                                                                                                                     | √ | √ |   |   |   |   | 13 |

|                                 |                                                                 |                                                                                          |                                                                     |                                                                                   |                                                                        |                                                                                                                                                                                                                                                                                      |   |   |   |  |  |  |  |  |   |
|---------------------------------|-----------------------------------------------------------------|------------------------------------------------------------------------------------------|---------------------------------------------------------------------|-----------------------------------------------------------------------------------|------------------------------------------------------------------------|--------------------------------------------------------------------------------------------------------------------------------------------------------------------------------------------------------------------------------------------------------------------------------------|---|---|---|--|--|--|--|--|---|
| et al.<br>(2014)                | University<br>of<br>Calgary                                     | Family<br>Medicine<br>Preceptor<br>Online<br>Development<br>program                      | family<br>medicine<br>preceptors                                    | provider and<br>coach-<br>Facilitator of<br>learning and<br>mentor                | metho<br>dology<br>,<br>One<br>group,<br>Pretest-<br>posttest          | increases in<br>mean comfort<br>with all the<br>precepting<br>skills taught:<br>giving<br>effective<br>feedback,<br>using<br>questions to<br>teach,<br>teaching<br>communicatio<br>ns skills,<br>helping<br>learners in<br>difficulty, and<br>making<br>teaching time-<br>efficient. |   |   |   |  |  |  |  |  |   |
| Srivasta<br>va et al.<br>(2016) | India,<br>Jawaharla<br>l Nehru<br>Medical<br>College<br>(JNMC)  | A one-year<br>Faculty<br>Development<br>Fellowship<br>Program in<br>Medical<br>Education | 40<br>faculty<br>members<br>from<br>different<br>medical<br>schools | Scholar and<br>researcher                                                         | Mixed<br>metho<br>dology<br>,<br>One<br>group,<br>Pretest-<br>posttest | Changes in<br>participants'<br>knowledge<br>regarding<br>educational<br>research.                                                                                                                                                                                                    |   |   | √ |  |  |  |  |  | 9 |
| Pololi &<br>Frankel<br>(2005)   | USA,<br>East<br>Carolina<br>University<br>School of<br>Medicine | A year-long<br>faculty<br>development<br>programme                                       | 11<br>clinical<br>faculty from<br>6<br>different<br>clinical        | Information<br>provider and<br>coach-<br>Facilitator of<br>learning and<br>mentor | Qualita<br>tive<br>themat<br>ic and<br>content<br>analysi              | Significant<br>improvements<br>in<br>participants'<br>self-<br>awareness,                                                                                                                                                                                                            | √ | √ | √ |  |  |  |  |  | 9 |

|                            |                                          | departments                                                                                                                                      | s                                                        | teaching skills and habits of lifelong learning.                  |                                                                   |                                                                                                                                                       |   |   |   |  |  |    |
|----------------------------|------------------------------------------|--------------------------------------------------------------------------------------------------------------------------------------------------|----------------------------------------------------------|-------------------------------------------------------------------|-------------------------------------------------------------------|-------------------------------------------------------------------------------------------------------------------------------------------------------|---|---|---|--|--|----|
| Lee et al. (2018)          | USA, University of Chicago               | The 4-hour faculty workshop consisted of a lecture and a Group-Objective Structured Clinical Exam (GOSCE)                                        | 30 Family Medicine and General Internal Medicine Faculty | Information provider and coach-Facilitator of learning and mentor | Randomised controlled study, Pretest-posttest, delayed post-test  | No differences were found between longer versus shorter training; improvements in participants' patient-centered EHR use skills in clinical practice. | √ | √ | √ |  |  | 15 |
| Junod Perron et al. (2014) | Switzerland, Geneva University Hospitals | A 6-month faculty development programme consisted of 4-5 small group sessions (6-7 h in total) and 2 individual coaching sessions (2 h in total) | 28 clinical supervisors                                  | Information provider and coach                                    | Mixed methodology, One group, Pretest-posttest, delayed post-test | Increase in participants' communication skills teaching.                                                                                              | √ | √ | √ |  |  | 11 |

|                            |                                                          |                                                                                                                                                       |                                                                                           |                                                                   |                                                |                                                                                                                                                                                          |   |   |   |  |  |  |      |
|----------------------------|----------------------------------------------------------|-------------------------------------------------------------------------------------------------------------------------------------------------------|-------------------------------------------------------------------------------------------|-------------------------------------------------------------------|------------------------------------------------|------------------------------------------------------------------------------------------------------------------------------------------------------------------------------------------|---|---|---|--|--|--|------|
| Schaefer et al. (2014)     | USA, Northwestern University Feinberg School of Medicine | An 8-h multimodality training course featuring deliberate practice and feedback                                                                       | 17 clinical faculty members                                                               | Information provider and coach                                    | Randomised controlled study, Pretest-posttest  | Significant increases in participants' cardiac physical examination interpretation skills.                                                                                               |   |   | √ |  |  |  | 13.5 |
| Tricio et al. (2017)       | Chile, University of the Andes, School of Dentistry      | A year-long faculty development workshops in student-centered teaching methodologies                                                                  | 176 dental faculty members                                                                | Information provider and coach-Facilitator of learning and mentor | One group, Pretest-posttest                    | Significant decrease in teacher-focused approaches for faculty members from before to after the workshops.                                                                               | √ | √ | √ |  |  |  | 11.5 |
| Junod Perron et al. (2014) | Switzerland, Geneva University Hospitals                 | A six- to nine-month faculty development program comprising four to five 90-minute small group modules and two 60-minute individual coaching sessions | 48 clinical supervisors, 16 from the inpatient setting and 12 from the outpatient setting | Information provider and coach-Facilitator of learning and mentor | Non-equivalent control group, Pretest-posttest | No increase in the number of communication skills recognised by supervisors but significant increase in the number of communication issues discussed interactively in feedback sessions. |   | √ | √ |  |  |  | 12   |

|                        |                                                   |                                                                                                                                    |                                                 |                                                                                              |                             |                                                                                                                                                                                                                             |   |   |   |   |  |  |  |      |
|------------------------|---------------------------------------------------|------------------------------------------------------------------------------------------------------------------------------------|-------------------------------------------------|----------------------------------------------------------------------------------------------|-----------------------------|-----------------------------------------------------------------------------------------------------------------------------------------------------------------------------------------------------------------------------|---|---|---|---|--|--|--|------|
| Rodrigue et al. (2013) | USA, University of Queensland, School of Medicine | A faculty development curriculum consisted of 5 online modules                                                                     | 38 faculty members                              | Information provider and coach-Facilitator of learning and mentor                            | One group, Pretest-posttest | Statistically significant decrease in the number of faculty who reported that the program was not at all effective in providing tools to develop skills and habits.                                                         | √ | √ |   |   |  |  |  | 10.5 |
| Wong & Fang (2012)     | China, Zhejiang University School of Medicine     | Two-week faculty development program comprising eight small-group seminars based on the Stanford Faculty Development Program model | 28 early to mid-level medical faculty educators | Information provider and coach-Facilitator of learning and mentor-Assessor and diagnostician | One group, Pretest-posttest | Significant improvements in participants' self-reported teaching skills in both global areas of teaching competence as well as in the frequency of employing certain teaching behaviors associated with effective teaching. | √ | √ | √ | √ |  |  |  | 9.5  |
| Skeff et               | USA,                                              | 1-month of                                                                                                                         | 12                                              | Information                                                                                  | 3                           | Significant                                                                                                                                                                                                                 | √ | √ | √ | √ |  |  |  | 11   |

|                           |                                                                |                                                                      |                                                                                                |                                                                                                                                                                             |                                                                    |                                                                                                                                                                                              |   |   |   |   |   |  |  |      |
|---------------------------|----------------------------------------------------------------|----------------------------------------------------------------------|------------------------------------------------------------------------------------------------|-----------------------------------------------------------------------------------------------------------------------------------------------------------------------------|--------------------------------------------------------------------|----------------------------------------------------------------------------------------------------------------------------------------------------------------------------------------------|---|---|---|---|---|--|--|------|
| al.<br>(1992)             | Stanford University Medical Center                             | facilitator training at the Stanford Faculty Development Program     | facilitators and 107 faculty from 12 institutions                                              | provider and coach- Facilitator of learning and mentor-Assessor and diagnostician                                                                                           | cohorts , Pretest-posttest                                         | improvements in participants' self-reported teaching performance.                                                                                                                            |   |   |   |   |   |  |  |      |
| Klein et al.<br>(2013)    | USA, Cincinnati Children's Hospital Medical Center             | A year-long national online faculty development activity on Facebook | 17 academic pediatric faculty from 17 different institutions across 12 states and 4 time zones | Scholar and researcher                                                                                                                                                      | Mixed methodology , One group, Pretest-posttest, delayed post-test | Significant increase in participants' self-reported professional Facebook usage.                                                                                                             | √ | √ | √ | √ |   |  |  | 12.5 |
| Pinheiro et al.<br>(2002) | USA, Michigan State University College of Osteopathic Medicine | A yearlong part-time faculty development fellowship program          | 54 community-based physician faculty                                                           | Information provider and coach- Facilitator of learning and mentor-Assessor and diagnostician - Curriculum developer and implementer - Scholar and researcher- Professional | Mixed methodology , One group, Pretest-posttest, delayed post-test | Significant increase in participants' self-reported use of educational concepts and greater participation in the educational activities of their home institutions; changes in participants' | √ | √ | √ | √ | √ |  |  | 10   |

|                       |                                         |                                                                                                               |                                                                                                           |                                                                   |                                            |                                                                                                                                                                                                                                |   |   |   |   |   |   |      |
|-----------------------|-----------------------------------------|---------------------------------------------------------------------------------------------------------------|-----------------------------------------------------------------------------------------------------------|-------------------------------------------------------------------|--------------------------------------------|--------------------------------------------------------------------------------------------------------------------------------------------------------------------------------------------------------------------------------|---|---|---|---|---|---|------|
|                       |                                         |                                                                                                               |                                                                                                           |                                                                   |                                            | perceptions as medical educators and positive impact on the educational process in their home institutions.                                                                                                                    |   |   |   |   |   |   |      |
| Shields et al. (2007) | USA, Harvard Medical School             | Three two-hour faculty development sessions before the course, and a weekly faculty meeting during the course | 70 tutors (Gastroenterology Faculty and attendings or residents in other medical or surgical specialties) | Information provider and coach-Facilitator of learning and mentor | 3 cohorts, Pretest-posttest                | The tutor as a discussion leader had a significant and positive impact on learning in tutorials, achieving course objectives, improving overall course satisfaction, and increasing a standardized national exam's mean score. | √ | √ | √ | √ | √ | √ | 13   |
| Green et al. (2003)   | USA, Yale University School of Medicine | The 3-hour faculty development workshop                                                                       | 26 university-based and community-based                                                                   | Information provider and coach-Facilitator of learning and        | One group, Pretest-posttest, delayed post- | Significant improvements in participants' self-reported                                                                                                                                                                        | √ | √ | √ | √ | √ |   | 11.5 |



|                             |                                                                      |                                                                                                                                                                  | general<br>medicine<br>faculty                              | mentor-<br>Assessor and<br>diagnostician<br>- Role model                                                                                                                              | test                                                                   | ambulatory<br>precepting and<br>primary care<br>genetics skill.                                                                                          |   |   |   |  |  |  |      |
|-----------------------------|----------------------------------------------------------------------|------------------------------------------------------------------------------------------------------------------------------------------------------------------|-------------------------------------------------------------|---------------------------------------------------------------------------------------------------------------------------------------------------------------------------------------|------------------------------------------------------------------------|----------------------------------------------------------------------------------------------------------------------------------------------------------|---|---|---|--|--|--|------|
| Salerno<br>et al.<br>(2003) | USA,<br>Tripler<br>Army<br>Medical<br>Center                         | Three 90-<br>minute<br>ambulatory<br>faculty<br>development<br>seminars on<br>written<br>feedback                                                                | 9<br>faculty<br>members<br>and 44<br>third-year<br>students | Information<br>provider and<br>coach-<br>Facilitator of<br>learning and<br>mentor-<br>Assessor and<br>diagnostician                                                                   | Mixed<br>metho<br>dology<br>,<br>One<br>group,<br>Pretest-<br>posttest | Significant<br>improvements<br>in the quantity<br>and quality of<br>written<br>feedback<br>delivered in<br>the<br>ambulatory<br>setting.                 | √ | √ | √ |  |  |  | 11.5 |
| Chung<br>et al.<br>(2012)   | Korea,<br>Korean<br>Society<br>for<br>Simulation<br>in<br>Healthcare | A 3-day<br>international,<br>collaborative,<br>multi-<br>professional<br>faculty<br>development<br>program on<br>Simulation-<br>Based<br>Healthcare<br>Education | 30<br>faculty<br>teachers                                   | Information<br>provider and<br>coach-<br>Facilitator of<br>learning and<br>mentor-<br>Assessor and<br>diagnostician<br>- Curriculum<br>developer<br>and<br>implementer-<br>Role model | One<br>group,<br>Pretest-<br>posttest                                  | Significant<br>improvements<br>in<br>participants'<br>self-reported<br>knowledge,<br>skills, and<br>attitudes<br>(KSA) toward<br>simulation<br>teaching. | √ | √ | √ |  |  |  | 11   |
| Schlair<br>et al.<br>(2017) | USA,<br>Montefiore<br>Medical<br>Center                              | The 3-hour<br>longitudinal<br>faculty<br>development<br>program                                                                                                  | 36<br>faculty<br>members<br>and 62<br>residents             | Assessor and<br>diagnostician                                                                                                                                                         | Mixed<br>metho<br>dology<br>,<br>One<br>group,                         | Significant<br>improvements<br>in<br>participants'<br>feedback<br>quality.                                                                               | √ | √ | √ |  |  |  | 10.5 |

|                          |                                               |                                                                                                                                                                                          |                                                   |                                                                   | Pretest-<br>posttest                                               |                                                                                                   |   |   |   |   |   |  |      |
|--------------------------|-----------------------------------------------|------------------------------------------------------------------------------------------------------------------------------------------------------------------------------------------|---------------------------------------------------|-------------------------------------------------------------------|--------------------------------------------------------------------|---------------------------------------------------------------------------------------------------|---|---|---|---|---|--|------|
| McAndrew et al. (2013)   | USA, New York University College of Dentistry | A five-year Excellence in Clinical Teaching Program                                                                                                                                      | 59 dental faculty members                         | Information provider and coach-Facilitator of learning and mentor | 8 cohorts , Pretest-posttest, delayed post-test                    | Significant improvements in participants' self-assessment of their teaching ability.              | √ | √ | √ | √ | √ |  | 9.5  |
| Efstathiou et al. (2018) | USA, Harvard Medical School                   | A formal mentorship program consisted of assignment of mentor pairs, three formal training sessions over the course of nine months, and regular informal meetings throughout the program | 23 junior faculty mentees and 91 junior faculty   | Facilitator of learning and mentor                                | Non-equivalent control group, Pretest-posttest , delayed post-test | Significant increase in participants' satisfaction in five of seven domains related to mentoring. | √ | √ |   | √ |   |  | 12.5 |
| Eckstrom et al. (2006)   | USA, Oregon Health & Science University       | A two-year One-Minute Preceptor faculty development workshop                                                                                                                             | 68 internal medicine continuity clinic preceptors | Information provider and coach-Facilitator of learning and mentor | Nonrandomized control led study,                                   | Improvements in participants' self-reported teaching behaviors                                    |   | √ | √ | √ |   |  | 16   |

|                         |                                           |                                                                                                                                           |                                                       |                                                              |                                                  |                                                                                                                                                                                         |   |   |   |  |  |  |      |
|-------------------------|-------------------------------------------|-------------------------------------------------------------------------------------------------------------------------------------------|-------------------------------------------------------|--------------------------------------------------------------|--------------------------------------------------|-----------------------------------------------------------------------------------------------------------------------------------------------------------------------------------------|---|---|---|--|--|--|------|
|                         |                                           |                                                                                                                                           | (44 control and 24 intervention faculty)              |                                                              | Pretest-posttest, delayed post-test              | following the intervention.                                                                                                                                                             |   |   |   |  |  |  |      |
| Nasmith & Franco (1997) | Canada, McGill University                 | A half-day workshop on minor surgical procedures                                                                                          | 25 family medicine faculty members                    | Information provider and coach                               | One group, Pretest-posttest, delayed post-test   | Increase in the reported number of minor surgical procedures performed and taught, and in faculty members' perceptions of their competence in performing and teaching these procedures. | √ | √ | √ |  |  |  | 7    |
| Fornari et al. (2018)   | USA, Hofstra Northwell School of Medicine | A 10-month interprofessional faculty development curriculum consisted of small group work, experiential learning, and critical reflection | 169 high potential mentors and 61 facilitator leaders | Facilitator of learning and mentor- Role model- Professional | Mixed methodology, two cohorts, Pretest-posttest | Significant increases in participants' perceptions of humanistic teaching skills; significant increases in participants' self-reported mentoring                                        | √ | √ | √ |  |  |  | 11.5 |

|                         |                                                    |                                                                                                                          |                                              |                                                                                                                                                                                              |                                                                 | skills.                                                                                                                                                                |   |   |   |   |   |  |      |
|-------------------------|----------------------------------------------------|--------------------------------------------------------------------------------------------------------------------------|----------------------------------------------|----------------------------------------------------------------------------------------------------------------------------------------------------------------------------------------------|-----------------------------------------------------------------|------------------------------------------------------------------------------------------------------------------------------------------------------------------------|---|---|---|---|---|--|------|
| Morzinski et al. (2003) | USA, Medical College of Wisconsin                  | A comprehensive, 2-year, within-institution faculty development program included monthly seminars and mentor involvement | 35 full-time family medicine faculty members | Information provider and coach-Facilitator of learning and mentor-Assessor and diagnostician - Curriculum developer and implementer - Scholar and researcher-Professional-Manager and leader | Longitudinal, multi-method study, six cohorts, Pretest-posttest | Significant, positive changes in the program completers' competence, leadership, presentations, and publications, as well as enhanced retention in academic medicine.  | √ | √ | √ | √ | √ |  | 14   |
| Rosenbaum et al. (2005) | USA, University of Iowa Carver College of Medicine | A 3-year teaching scholars program included monthly sessions, teaching videotapes and faculty development projects       | 24 faculty members                           | Information provider and coach-Facilitator of learning and mentor-Assessor and diagnostician - Curriculum developer and implementer - Scholar and researcher-Professional-                   | One group, Pretest-posttest                                     | Substantial increase in program participants' facilitation of teaching skills workshops and development of teaching improvement systems within their home departments. |   |   | √ | √ | √ |  | 11.5 |

|                       |                                                                                                 |                                                     |                                                       |                                                                                                             |                                                   |                                                                                                                                                                                                                                                                                                              | Manager and leader |   |   |   |   |  |  |    |
|-----------------------|-------------------------------------------------------------------------------------------------|-----------------------------------------------------|-------------------------------------------------------|-------------------------------------------------------------------------------------------------------------|---------------------------------------------------|--------------------------------------------------------------------------------------------------------------------------------------------------------------------------------------------------------------------------------------------------------------------------------------------------------------|--------------------|---|---|---|---|--|--|----|
| Simpson et al. (2004) | USA, Ambulatory Pediatric Association (APA)/Health Resources and Services Administration (HRSA) | Three 2-day workshops over a 12- to 14-month period | 107 pediatric educators from across the United States | Information provider and coach-Facilitator of learning and mentor-Scholar and researcher-Manager and leader | Multi-method study, two cohorts, Pretest-posttest | The faculty development program achieved its objectives, with participants leading workshops, impacting faculty development infrastructure, advancing their own careers, and being strategically positioned in leadership roles with the skills to improve primary care education in the ambulatory setting. | √                  | √ | √ | √ | √ |  |  | 15 |
| Coogle et al. (2016)  | USA, Virginia Common                                                                            | A 10-month, 160-hour interprofessi                  | 26 participants from                                  | Information provider and coach-                                                                             | Quasi-experi-mental                               | Significant gains in perceived self-                                                                                                                                                                                                                                                                         | √                  | √ | √ | √ |   |  |  | 13 |

|                     |                                                          |                                                                                        |                                                                                                                     |                                                                                |                                                 |                                                                                                                                     |   |   |   |   |   |   |     |
|---------------------|----------------------------------------------------------|----------------------------------------------------------------------------------------|---------------------------------------------------------------------------------------------------------------------|--------------------------------------------------------------------------------|-------------------------------------------------|-------------------------------------------------------------------------------------------------------------------------------------|---|---|---|---|---|---|-----|
|                     | wealth University                                        | onal faculty development programme in geriatrics                                       | medicine, nursing, pharmacy, physical therapy, occupational therapy, social work, and the allied health professions | Assessor and diagnostician - Curriculum developer and implementer              | study with pre-test post-test design            | efficacy and changes in academic teaching, career development, and clinical supervision.                                            |   |   |   |   |   |   |     |
| Davis et al. (2013) | USA, University of Oklahoma College of Pharmacy          | One semester Education Scholar Active Learning cohort                                  | 11 pharmacy faculty                                                                                                 | Information provider and coach-Facilitator of learning and mentor              | Mixed methodology , One group, Pretest-posttest | Increase in participants' knowledge of, perceptions of, and implementation of active learning strategies in the didactic classroom. | √ | √ | √ |   |   |   | 7.5 |
| Blatt et al. (2018) | USA, The George Washington University School of Medicine | A 2-year GW-Gold Humanistic Mentor Development Program consisted of two summer evening | 44 faculty (22 physicians and 22 psychosocial professionals) and 180 first-year                                     | Information provider and coach-Facilitator of learning and mentor-Professional | Mixed methodology , One group, Pretest-posttest | Increase in participants' confidence in their humanistic skills; professional and personal growth and continued                     | √ | √ | √ | √ | √ | √ | 14  |

|                      |                                                                    |                                                                 |                                                                                                     |                                                                   |                                                                         |                                                                                                                |   |   |   |  |  |  |      |
|----------------------|--------------------------------------------------------------------|-----------------------------------------------------------------|-----------------------------------------------------------------------------------------------------|-------------------------------------------------------------------|-------------------------------------------------------------------------|----------------------------------------------------------------------------------------------------------------|---|---|---|--|--|--|------|
|                      |                                                                    | meetings and eight Piggyback FD workshops                       | medical students                                                                                    |                                                                   |                                                                         | professional identity development in both mentors and students.                                                |   |   |   |  |  |  |      |
| Baral et al. (2010)  | Nepal, B. P. Koirala Institute of Health Sciences                  | A three day long “Training on Problem Based Learning” workshops | 25 heterogeneous groups of teachers representing medical, dental, nursing and public health schools | Information provider and coach-Facilitator of learning and mentor | One group, Pretest-posttest                                             | Significant gain in participants’ knowledge of and perceptions of development and dissemination of PBL manual. | √ | √ | √ |  |  |  | 9    |
| Reader et al. (2015) | USA, Montefiore Medical Center/Albert Einstein College of Medicine | 26 half-day workshops over a 12- to 14-month period             | 10 busy clinician educators                                                                         | Scholar and researcher                                            | Mixed methodology , three cohorts , Pretest-posttest, delayed post-test | Increase in participants’ confidence, knowledge and skills to conduct educational research.                    | √ | √ | √ |  |  |  | 11.5 |
| Skeff et al. (1999)  | USA, five regions of United States                                 | Five regional 1- to 2-day teaching-improvement workshops        | 282 university and community faculty                                                                | Information provider and coach-Facilitator of learning and        | Five cohorts , Pretest-posttest                                         | Increase in participants’ knowledge, skills, and attitudes                                                     | √ | √ | √ |  |  |  | 10   |

|                      |                                                         |                                                                                  |              |                                                                   |                                                |                                                                                                                                                                                                                                      |   |   |  |  |  |  |  |   |
|----------------------|---------------------------------------------------------|----------------------------------------------------------------------------------|--------------|-------------------------------------------------------------------|------------------------------------------------|--------------------------------------------------------------------------------------------------------------------------------------------------------------------------------------------------------------------------------------|---|---|--|--|--|--|--|---|
|                      |                                                         |                                                                                  |              | mentor                                                            |                                                | regarding office-based teaching; statistically significant changes in participants' behaviors pertaining to fostering a positive learning climate, communicating goals, and providing feedback, as well as general teaching ability. |   |   |  |  |  |  |  |   |
| Thampy & Bond (2016) | UK, University of Manchester, Manchester Medical School | Two 90-min contrasting teaching CPD workshops within a full-day tutor conference | 73 GP tutors | Information provider and coach-Facilitator of learning and mentor | Non-equivalent control group, Pretest-posttest | Statistically significant rises in teaching ideas post-intervention; tutors who used unstructured discussions generated more ideas                                                                                                   | √ | √ |  |  |  |  |  | 9 |



|                        |                                                        |                                                                                                                  |                                                                                        |                                                                                                                                     |                                                                     |                                                                                                                                                              |   |   |   |   |   |  |      |
|------------------------|--------------------------------------------------------|------------------------------------------------------------------------------------------------------------------|----------------------------------------------------------------------------------------|-------------------------------------------------------------------------------------------------------------------------------------|---------------------------------------------------------------------|--------------------------------------------------------------------------------------------------------------------------------------------------------------|---|---|---|---|---|--|------|
|                        |                                                        |                                                                                                                  |                                                                                        |                                                                                                                                     |                                                                     | and reported greater intention to change future teaching practice than those guided by PBL-based vignettes.                                                  |   |   |   |   |   |  |      |
| Lemoine et al. (2015)  | USA, Louisiana State University Health Sciences Center | An 8-month interprofessional faculty development in simulation-based education consisted of 12-module curriculum | 215 health professions faculty                                                         | Information provider and coach-Facilitator of learning and mentor-Assessor and diagnostician - Curriculum developer and implementer | Four cohorts , Pretest-posttest                                     | High faculty receptivity, statistically significant gains for all targeted knowledge, skills, and perspectives, and highly effective overall implementation. | √ | √ | √ |   |   |  | 12.5 |
| Williams et al. (2008) | USA, University of Michigan                            | A four-year faculty development seminar in geriatrics                                                            | 15 faculty from seven surgical and related disciplines and five medical subspecialties | Information provider and coach-Facilitator of learning and mentor-Assessor and diagnostician - Curriculum developer                 | Mixed methodology , three cohorts , Pretest-posttest, delayed post- | Changes in attitudes and knowledge of faculty participants; expanded curricula and teaching activities in geriatrics in                                      | √ | √ | √ | √ | √ |  | 13   |

|                       |                                                |                                                                                                                                  |                                                                                                                    |                                                                                              |                                                   |                                                                                                                                                          |   |   |   |  |  |  |  |     |
|-----------------------|------------------------------------------------|----------------------------------------------------------------------------------------------------------------------------------|--------------------------------------------------------------------------------------------------------------------|----------------------------------------------------------------------------------------------|---------------------------------------------------|----------------------------------------------------------------------------------------------------------------------------------------------------------|---|---|---|--|--|--|--|-----|
|                       |                                                |                                                                                                                                  |                                                                                                                    | and<br>implementer<br>- Scholar and<br>researcher-<br>Professional-                          | test                                              | participating<br>departments,<br>and enhanced<br>and altered<br>career<br>trajectories of<br>faculty<br>participants.                                    |   |   |   |  |  |  |  |     |
| Kuhnigk et al. (2013) | Germany, Medical Faculty of Hamburg University | Four-year teacher training workshops                                                                                             | 322 faculty members                                                                                                | Information provider and coach-Facilitator of learning and mentor-Assessor and diagnostician | Four cohorts, Pretest-posttest, delayed post-test | Significant increases in participants' self-assessment of didactic skills up to four years after attending a faculty development workshop.               | √ | √ | √ |  |  |  |  | 11  |
| Weppner et al. (2017) | USA, University of Michigan                    | A year-long interprofessional faculty development curriculum included teaching seminars, journal clubs and teaching observations | 35 faculty members included internal medicine and related subspecialties, pharmacy, nurse practitioner, psychology | Information provider and coach-Assessor and diagnostician                                    | One group, Pretest-posttest                       | Increase in the number of interprofessional copresentations; increased presentation to interprofessional groups and increased cross-profession feedback. |   |   | √ |  |  |  |  | 8.5 |

|                     |                                                              |                                                                        | and<br>psychiatry                           |                                                                                                                                     |                                |                                                                                                                                                                                          |   |   |   |  |  |      |
|---------------------|--------------------------------------------------------------|------------------------------------------------------------------------|---------------------------------------------|-------------------------------------------------------------------------------------------------------------------------------------|--------------------------------|------------------------------------------------------------------------------------------------------------------------------------------------------------------------------------------|---|---|---|--|--|------|
| Mkony et al. (2012) | Tanzania, Muhimbili University of Health and Allied Sciences | A 3-day workshop on competency-based education                         | 97 faculty members                          | Information provider and coach-Facilitator of learning and mentor-Assessor and diagnostician - Curriculum developer and implementer | Two cohorts , Pretest-posttest | Increase in faculty confidence to a level near 'very confident' for items related to explaining, teaching, and assessing competencies; increase in confidence for developing curriculum. | √ |   |   |  |  | 9    |
| Hatem et al. (2007) | USA, University of Massachusetts Medical School              | A 5-day faculty development workshop on teaching the medical interview | 79 medical school faculty                   | Information provider and coach-Facilitator of learning and mentor-                                                                  | One group, Pretest-posttest    | Significant changes in mean scores of participants' confidence in interview, clinical, teaching and self-awareness skills.                                                               | √ | √ | √ |  |  | 11   |
| Davis et al. (2015) | USA, Emory University                                        | A 2-hour facilitator training session in inter-                        | 53 faculty from the schools of medicine and | Information provider and coach-Facilitator of learning and                                                                          | Quasi-experimental study with  | Significant changes in participants' self-concept for the                                                                                                                                | √ | √ | √ |  |  | 13.5 |

|                          |                                                                           | professional education                                                                         | nursing                                                                   | mentor-                                                                                                   | pre-test post-test design                      | knowledge, skills and attitudes toward inter-professional teamwork.                                                                                                                                 |   |   |   |  |  |  |    |
|--------------------------|---------------------------------------------------------------------------|------------------------------------------------------------------------------------------------|---------------------------------------------------------------------------|-----------------------------------------------------------------------------------------------------------|------------------------------------------------|-----------------------------------------------------------------------------------------------------------------------------------------------------------------------------------------------------|---|---|---|--|--|--|----|
| McCurdy et al. (2004)    | USA, The University of Nebraska Medical Center                            | A year-long course included eight 3-hour workshop sessions                                     | 22 faculty from the colleges of Medicine, Dentistry, Nursing and Pharmacy | Manager and leader                                                                                        | Mixed methodology, One group, Pretest-posttest | Statistically significant changes in participants' knowledge about leadership competencies; three themes arose from the analysis of projects: change, management, and interpersonal communications. |   |   | √ |  |  |  | 10 |
| Kesselheim et al. (2019) | USA, The American Society of Hematology (ASH) Medical Educators Institute | A curriculum blending in-person training, which took the form of a 3.5-day intensive workshop, | 20 faculty from 20 different institutions                                 | Information provider and coach-Facilitator of learning and mentor-Assessor and diagnostician - Curriculum | One group, Pretest-posttest                    | Significant increase in participants' self-reported confidence in the knowledge, skills, and attitudes                                                                                              | √ | √ | √ |  |  |  | 10 |

|                        |                                              |                                                                                                                         |                                                                                                         |                                                                                              |                                  |                                                                                                                                                    |   |   |   |   |   |  |  |      |
|------------------------|----------------------------------------------|-------------------------------------------------------------------------------------------------------------------------|---------------------------------------------------------------------------------------------------------|----------------------------------------------------------------------------------------------|----------------------------------|----------------------------------------------------------------------------------------------------------------------------------------------------|---|---|---|---|---|--|--|------|
|                        |                                              | with follow-up distance learning in the form of a webinar series                                                        |                                                                                                         | developer and implementer - Scholar and researcher-Professional-Manager and leader           |                                  | targeted by the curriculum.                                                                                                                        |   |   |   |   |   |  |  |      |
| Podrazik et al. (2008) | USA, University of Chicago                   | The faculty development programme consisted of twelve 4-hour sessions                                                   | 29 hospitalist and general internal medicine faculty members                                            | Information provider and coach-Facilitator of learning and mentor-Assessor and diagnostician | Three cohorts , Pretest-posttest | Significant improvements in participants' knowledge, attitudes to geriatrics, and perceived behavior in teaching and practicing geriatrics skills. | √ | √ | √ | √ |   |  |  | 10   |
| Evans et al. (2014)    | USA, The Stanford Geriatric Education Center | The 12-hour, eight-module core curriculum was implemented during an intensive weeklong program over a three-year period | 34 faculty participants from 11 disciplines, including medicine, came from 19 institutions in 12 states | Information provider and coach                                                               | One group, Pretest-posttest      | Positive effect on participants' knowledge, skills, and attitudes related to topics in Health Literacy and Ethnogeriatrics (HLE);                  | √ | √ | √ | √ | √ |  |  | 11.5 |

|                       |                                         |                                                                                                         |                    |                        |                                                                       |                                                                                                                                                                                                                             |   |   |   |   |   |  |    |
|-----------------------|-----------------------------------------|---------------------------------------------------------------------------------------------------------|--------------------|------------------------|-----------------------------------------------------------------------|-----------------------------------------------------------------------------------------------------------------------------------------------------------------------------------------------------------------------------|---|---|---|---|---|--|----|
|                       |                                         |                                                                                                         |                    |                        |                                                                       | positive effect on participants' scores on the Health Beliefs and Attitudes Survey and dissemination of HLE knowledge by participants at their home institutions.                                                           |   |   |   |   |   |  |    |
| Baldwin et al. (2017) | USA, The Academic Pediatric Association | A national, three-year, cohort-based certification program focused on fostering educational scholarship | 50 faculty members | Scholar and researcher | Mixed methodology, three cohorts, Pretest-posttest, delayed post-test | Significant increase in participants' self-perceived proficiency in four domains (scholarly approach, professional interactions, educational scholarship, and other educational knowledge/skills); significant increases in | √ | √ | √ | √ | √ |  | 13 |

|                       |                                      |                                                                                                                   |                             |                                                                                              |                             |                                                                                                                                                                    |   |   |   |   |  |  |      |
|-----------------------|--------------------------------------|-------------------------------------------------------------------------------------------------------------------|-----------------------------|----------------------------------------------------------------------------------------------|-----------------------------|--------------------------------------------------------------------------------------------------------------------------------------------------------------------|---|---|---|---|--|--|------|
|                       |                                      |                                                                                                                   |                             |                                                                                              |                             | the numbers of peer-reviewed publications, national presentations, and national leadership/ membership positions, as well as in the number of academic promotions. |   |   |   |   |  |  |      |
| Garner et al. (2018)  | India, nursing school in Bengaluru   | The 8-h faculty development workshop on simulation                                                                | 87 nurse faculty            | Information provider and coach-Facilitator of learning and mentor-Assessor and diagnostician | One group, Pretest-posttest | Significant improvements in total self-efficacy and subscale scores among nurse educators.                                                                         |   | √ |   |   |  |  | 12.5 |
| Berbano et al. (2006) | USA, Walter Reed Army Medical Center | Seven 2-hour sessions of faculty development included didactic, role-play, and videotaped performance evaluation. | 8 internal medicine faculty | Information provider and coach-Facilitator of learning and mentor-Assessor and diagnostician | One group, Pretest-posttest | Improvement in participants' teaching behaviors, specifically in the quality of questions asked and feedback provided.                                             | √ | √ | √ | √ |  |  | 12.5 |

|                      |                                                             |                                                                      |                                                               |                                                                                                                                                                                 |                                                               |                                                                                                                                                          |   |   |   |   |   |  |      |
|----------------------|-------------------------------------------------------------|----------------------------------------------------------------------|---------------------------------------------------------------|---------------------------------------------------------------------------------------------------------------------------------------------------------------------------------|---------------------------------------------------------------|----------------------------------------------------------------------------------------------------------------------------------------------------------|---|---|---|---|---|--|------|
| Nemec & Welch (2016) | USA, Western New England University College of Pharmacy     | A 1.5-hour faculty development seminar                               | 24 pharmacy faculty                                           | Assessor and diagnostician                                                                                                                                                      | One group, Pretest-posttest                                   | Significant improvement in the quality of in-house MCQ and faculty confidence in constructing new MCQ.                                                   |   |   | √ |   |   |  | 12.5 |
| Rust et al. (2006)   | USA, Morehouse School of Medicine                           | A 1-year longitudinal/modular workshops                              | 113 community-based preceptors and new or established faculty | Information provider and coach-Facilitator of learning and mentor-Assessor and diagnostician - Curriculum developer and implementer - Scholar and researcher-Manager and leader | 10 cohorts, Pretest-posttest                                  | Improvement in participants' self-reported before-after competencies in specific academic skills such as teaching, writing, research, and grant writing. | √ | √ | √ | √ | √ |  | 14   |
| Walsh et al. (2019)  | USA, the Brody School of Medicine, East Carolina University | The 15-Month faculty development program included six 2-day learning | 27 clinical faculty members                                   | Information provider and coach-Facilitator of learning and mentor-Curriculum developer                                                                                          | Equivalent control group, Pretest-posttest, delayed post-test | Significant increase in participants' self-assessed knowledge of quality improvement, patient safety,                                                    | √ | √ | √ | √ |   |  | 12   |



|                        |                                                             |                                                                                       |                              |                                                                                                      |                                                                       |                                                                                                                                                                                                                          |   |   |   |   |  |  |  |  |      |
|------------------------|-------------------------------------------------------------|---------------------------------------------------------------------------------------|------------------------------|------------------------------------------------------------------------------------------------------|-----------------------------------------------------------------------|--------------------------------------------------------------------------------------------------------------------------------------------------------------------------------------------------------------------------|---|---|---|---|--|--|--|--|------|
|                        |                                                             | sessions on the principles and application of health systems science                  |                              | and implementer-<br>- Scholar and researcher-<br>Professional-<br>Manager and leader                 |                                                                       | adult education principles, and curricular development; significant increase in participants' self-assessed knowledge and confidence in teaching and applying health systems science principles at 1 year post training. |   |   |   |   |  |  |  |  |      |
| Phillips et al. (2019) | USA, Chamberlain College of Nursing, Chamberlain University | A 2-hour eLearning faculty development course in clinical teaching included 8 modules | 237 clinical nurse educators | Information provider and coach-<br>Facilitator of learning and mentor-<br>Assessor and diagnostician | Mixed methodology ,<br>One group, Pretest-posttest, delayed post-test | Significant increase in participants' self-reported knowledge and skill acquisition including transfer of new skills to the nurse educator role at 3 months after                                                        | √ | √ | √ | √ |  |  |  |  | 10.5 |

|                          |                                                                 |                                                          |                                  |                                                                                                                                                                               |                                                 |                                                                                                      |   |   |   |  |  |  |  |      |
|--------------------------|-----------------------------------------------------------------|----------------------------------------------------------|----------------------------------|-------------------------------------------------------------------------------------------------------------------------------------------------------------------------------|-------------------------------------------------|------------------------------------------------------------------------------------------------------|---|---|---|--|--|--|--|------|
|                          |                                                                 |                                                          |                                  |                                                                                                                                                                               |                                                 | completing the course.                                                                               |   |   |   |  |  |  |  |      |
| Yoon et al. (2016)       | Mongolia, The Mongolian National University of Medical Sciences | The 17-day faculty development workshops over 3 weeks    | 325 faculty members              | Information provider and coach-Facilitator of learning and mentor-Assessor and diagnostician - Curriculum developer and implementer-Scholar and researcher-Manager and leader | Seven groups, Pretest-posttest                  | Significant improvements in participants' attitudes and perspectives after the educational programs. | √ | √ |   |  |  |  |  | 9.5  |
| Dellings & Curtis (2017) | USA, School of Dentistry, University of California              | One-hour training workshop                               | 24 dental school faculty members | Assessor and diagnostician                                                                                                                                                    | Randomised controlled study, Pretest - posttest | Significant improvement in MCQ item quality in the intervention group.                               |   |   | √ |  |  |  |  | 12.5 |
| Safavi & Sadeghi (2017)  | Iran, Hamedan University of Medical Sciences                    | 7 one-week training-consulting courses with a supervised | 158 faculty members              | Curriculum developer and implementer                                                                                                                                          | Seven cohorts, Pretest-posttest                 | Significant increase in the number of standard lesson plans developed by                             | √ | √ | √ |  |  |  |  | 13.5 |

|                                    |                                                            |                                              |                                             |                               |                                                                                         |                                                                                               |  |  |   |  |  |      |
|------------------------------------|------------------------------------------------------------|----------------------------------------------|---------------------------------------------|-------------------------------|-----------------------------------------------------------------------------------------|-----------------------------------------------------------------------------------------------|--|--|---|--|--|------|
|                                    |                                                            | and feedback<br>on<br>experience<br>strategy |                                             |                               |                                                                                         | participants.                                                                                 |  |  |   |  |  |      |
| Derakhs<br>han et<br>al.<br>(2015) | Iran,<br>Qazvin<br>University<br>of<br>Medical<br>Sciences | 5 educational<br>workshops                   | faculty<br>members<br>from 7<br>departments | Assessor and<br>diagnostician | Quasi-<br>experi-<br>mental<br>study<br>with<br>pre-<br>test<br>post-<br>test<br>design | Significant<br>improvement<br>in MCQ item<br>quality after<br>the<br>educational<br>programs. |  |  | √ |  |  | 13.5 |
