# Supplementary material for: A systematic review of faculty development programs based on the Harden teacher’s role framework model
Source: PubMed Central journal article supplement (PMC10690997; doi:10.1186/s12909-023-04863-4), 2023-11-30
Supplement: 12909_2023_4863_MOESM4_ESM.pdf [file 12909_2023_4863_MOESM4_ESM.pdf]

1                   **Appendix 3.** The study findings based on the Harden teacher's role framework.

2                   *The teacher as an information provider and coach*

3                   With reference to Harden's domains, the one most covered by the faculty development  
4                   programs is an information provider and coach, which can be identified in 91 studies [1-91].  
5                   Of these, the majority were in the form of workshops (n=32, 35.16%) with various durations  
6                   [5, 8, 9, 11-13, 20, 25, 28, 33, 34, 36, 39, 41-43, 45, 46, 48, 54, 57-59, 64, 68, 69, 72-75, 85,  
7                   87]. Nearly 16.5% of the 91 interventions were described as a short course [1, 2, 6, 18, 19, 22,  
8                   23, 50, 55, 56, 70, 78, 80, 81, 91] and fifteen as a seminar series [15, 21, 24, 35, 38, 40, 44, 49,  
9                   60, 63, 77, 82, 83, 89, 90]. In two studies [14, 47], the use of a mentorship program was  
10                  described. There were two fellowship studies [37, 71]. Twenty (21.97%) were described as a  
11                  longitudinal program [3, 4, 7, 10, 16, 17, 27, 29, 30, 32, 52, 53, 61, 65-67, 76, 84, 86, 88].  
12                  Pharmacy, nursing, medical, and dental faculty as well as basic science and clinical science  
13                  teachers from different departments participated in these studies.

14                  The majority of studies (n=58, 63.73%) used a single-group with a pre- and post- test design  
15                  [2, 4-6, 13-22, 28, 30-32, 35-37, 42, 44-50, 54-56, 58-60, 62-65, 68, 70-74, 76-79, 81, 82, 84,  
16                  86-91]. There were 19 (20.87%) cohort studies with pre-test post-test design [1, 8, 9, 11, 12,  
17                  24, 29, 38-41, 43, 51-53, 61, 66, 69, 75]. Eleven studies out of 91 were nonrandomised  
18                  controlled study with pre-test post-test design [3, 7, 10, 23, 25-27, 33, 34, 57, 67] and there  
19                  were three randomized controlled studies [80, 83, 85]. One author employed a qualitative  
20                  methodology only [76], though 11 (12.08%) researchers used a mixed methodology in their  
21                  work [2, 30, 36, 40, 43, 44, 47, 60, 71, 86, 91].

22 Although most studies (n=50, 54.94%) used self-report data to assess program outcomes [3, 4,  
23 8, 11-17, 19-21, 23, 24, 28, 30, 32, 33, 37, 41, 42, 45, 50, 52, 53, 55, 58, 59, 61, 63, 65-69, 71,  
24 72, 74-77, 81-83, 87-91], three studies [46, 51, 80] used objective data only. In 38 studies, in  
25 addition to self-reported data, objective data sources (e.g., expert opinion, student or resident  
26 ratings, student exam scores) were also used [1, 2, 5-7, 9, 10, 18, 22, 25-27, 29, 31, 34-36, 38-  
27 40, 43, 44, 47-49, 54, 56, 57, 60, 62, 64, 70, 73, 78, 79, 84-86]. Surveys were the most common  
28 method of data collection.

29 Program outcomes were largely self-reported and were most often measured using surveys.  
30 The majority of outcomes reported were at level 2B (83.51%), followed by level 1 (76.92%),  
31 level 2A (74.72%) and level 3 (51.64%). Far fewer outcomes are reported for levels 4A  
32 (18.68%) and 4B (4.39%). At level 1, seventy studies assessed participants' reactions, which  
33 included participants' satisfaction, perceptions of program usefulness, and views on the  
34 learning experience, its organization, presentation, content, teaching methods, and quality of  
35 instruction [1-6, 8-17, 20, 22-25, 28-33, 35-41, 43-45, 47, 49-55, 58, 59, 61, 64-68, 71, 73-78,  
36 81-87, 89-91]. The majority of participants reported a high level of satisfaction. They also  
37 valued the content of programs and particularly appreciated sessions on improving teaching  
38 skills. Changes in the attitudes or perceptions among participants (level 2A) was reported by  
39 sixty eight articles [1-5, 8-20, 23-25, 27-30, 32, 33, 35, 36, 38-43, 45, 47-50, 52, 54-61, 64-67,  
40 69, 71-76, 78, 81, 82, 84-86, 90, 91]. Most programs led to self-reported changes in  
41 participants' attitudes about and perceptions of teaching and learning. In one study [40], faculty  
42 reported increased enthusiasm to teach geriatrics, and attitudes toward teaching about and  
43 caring for older patients; another study [50] reported significant increases in participants'  
44 perceptions of the importance of four online teaching practices. Shealy et al. [19] reported

45 significant improvement in participants' self-reported self-awareness and self-confidence  
46 related to coaching. 76 articles [1-11, 13, 14, 17-19, 21, 23-32, 34, 35, 37-41, 43-49, 51-61,  
47 63, 65-68, 70-74, 76-82, 85-91] evaluated outcomes at level 2B (Modification of knowledge  
48 or skills). The majority of faculty development programs led to significant increases in faculty  
49 members' cognitive knowledge and skills of different aspects of the teaching-learning process  
50 and coaching such as educational concepts and principles, teaching strategies, methods and  
51 techniques. Participants also reported an improvement in their teaching and coaching skills  
52 such as teaching communication skills, clinical teaching, office-based teaching, giving  
53 effective feedback and promoting reflection. Sherbino et al. [2] reported improvements in  
54 participants' knowledge about ED-specific (Emergency Department) teaching strategies, and  
55 this improvement is maintained at one month. Wong et al. [87] reported significant  
56 improvements in participants' small-group teaching skills. In another study [11], participants'  
57 ratings of their abilities before and after the seminar revealed statistically significant changes  
58 in behaviors pertaining to fostering a positive learning climate, communicating goals, and  
59 providing feedback, as well as general teaching ability. Significant changes in faculty  
60 participants' OSTE scores and ratings were reported in one study [51]. In another [43], faculty  
61 members agreed or strongly agreed that the training strengthened their ability to provide well-  
62 rounded, criterion-based justification for grade deductions in professional judgment. They also  
63 reported that the faculty development program positively impacted their confidence in  
64 discussing professional judgment with students in clinic and enhanced their ability to  
65 consistently communicate in a respectful manner with students regarding professional  
66 judgment. Forty seven studies measured outcome at level 3 [1-10, 12, 13, 16, 19, 22, 24, 25,  
67 32, 34, 35, 38-40, 43, 44, 47, 52, 55-58, 60-62, 64-67, 71, 72, 77, 78, 82, 83, 88, 90, 91]. Most

68 programs led to significant improvements in participants' self-reported teaching behaviors,  
69 including improved teaching performance, better communication with learners and enhanced  
70 feedback quality. Teachers also reported changes in specific teaching methods (e.g., simulation  
71 teaching, office-based teaching, small-group teaching, online teaching), use of active learning  
72 strategies and fostering a positive learning climate. In one study [65] participants felt that their  
73 performance had improved in all 10 teaching behaviors after the intervention. Another study  
74 [16] reported significant increases in instructors' self-reported ability to teach  
75 pharmacogenomics to pharmacy students. Wong & Fang [90] reported significant  
76 improvements in participants' self-reported teaching skills in both global areas of teaching  
77 competence as well as in the frequency of employing certain teaching behaviors associated  
78 with effective teaching. Moreover, several studies reported observed behavioral changes. In  
79 one study [62], students reported changes in shadowing behavior of preceptors; in another [78]  
80 peer-, self-, and expert-assessment indicated a transfer of learning into teaching performance.  
81 Gardner et al. [22] reported that residents observed improvements in structured teaching  
82 behavior among participating faculty. Another study [7] reported significant increases in  
83 participants' use of 2 teaching methods (priming and feedback). Changes in the  
84 system/organizational practice (level 4A) was reported by seventeen articles [1, 4, 8, 9, 34, 38-  
85 40, 43, 47, 52, 58, 61, 71, 72, 78, 88]. For example, Green [72] found that participants reported  
86 fully or partially implemented many changes in their clinical practice, podiatric medical  
87 teaching, and administrative duties; Rosenbaum et al. [88] reported a substantial increase in  
88 program participants' facilitation of teaching skills workshops and development of teaching  
89 improvement systems within their home departments. Another study reported the faculty  
90 development program achieved its objectives, with participants leading workshops, impacting

91 faculty development infrastructure, advancing their own careers, and being strategically  
92 positioned in leadership roles with the skills to improve primary care education in the  
93 ambulatory setting [9]. Change among the participants' students, residents or colleagues (level  
94 4B) was reported only by four studies [1, 34, 43, 47]. In one study [1], the tutor as a discussion  
95 leader had a significant and positive impact on learning in tutorials, achieving course  
96 objectives, and increasing a standardized national exam's mean score.

97

### 98 *The teacher as a facilitator of learning and mentor*

99 Sixty four of faculty development programs focused on the domain of facilitator of learning  
100 and mentor [1, 3, 8-12, 14, 15, 17, 22-27, 29, 30, 32, 33, 35, 36, 38-42, 44-50, 52, 54, 55, 57-  
101 61, 65, 66, 69-71, 73-76, 78, 81, 84, 85, 87, 88, 90-96]. Of these, the majority were in the form  
102 of workshops (n=24, 37.50%) with various durations [8, 9, 11, 12, 25, 33, 36, 39, 41, 42, 45,  
103 46, 48, 54, 57-59, 69, 73-75, 85, 87, 92]. Nearly 14% of the 64 interventions were described  
104 as a short course [1, 22, 23, 50, 55, 70, 78, 81, 91] and nine as a seminar series [15, 24, 35, 38,  
105 40, 44, 49, 60, 90]. In three studies [14, 47, 96], the use of a mentorship program was described.  
106 There was only one fellowship study [71]. Seventeen (26.56%) were described as a  
107 longitudinal program [3, 10, 17, 27, 29, 30, 32, 52, 61, 65, 66, 76, 84, 88, 93-95]. Studies  
108 included faculty participants in medicine, nursing, pharmacy and dentistry and as well as basic  
109 science and clinical science teachers from different departments.

110 The majority of articles (n=37, 57.81%) used a single-group with a pre- and post- test design  
111 [14, 15, 17, 22, 30, 32, 35, 36, 42, 44-50, 54, 55, 58-60, 65, 70, 71, 73, 74, 76, 78, 81, 84, 87,  
112 88, 90-92, 94, 95]. There were 17 (26.56%) cohort studies with pre-test post-test design [1, 8,

113 9, 11, 12, 24, 29, 38-41, 52, 61, 66, 69, 75, 93]. Nine studies out of 64 were nonrandomised  
114 controlled study with pre-test post-test design [3, 10, 23, 25-27, 33, 57, 96] and there was one  
115 randomized controlled study [85]. One author employed a qualitative methodology only [76],  
116 though 9 (14.06%) researchers used a mixed methodology in their work [30, 36, 40, 44, 47, 60,  
117 71, 91, 93].

118 Although most studies (nearly 55% of the 64 interventions) used self-report data to assess  
119 program outcomes [3, 8, 11, 12, 14, 15, 17, 23, 24, 30, 32, 33, 41, 42, 45, 50, 52, 55, 58, 59,  
120 61, 65, 66, 69, 71, 74-76, 81, 87, 88, 90, 91, 94, 95], two studies [46, 92] used objective data  
121 only. In 27 studies, in addition to self-reported data, objective data sources (e.g., expert opinion,  
122 student or resident ratings, student exam scores) were also used [1, 9, 10, 22, 25-27, 29, 35,  
123 36, 38-40, 44, 47-49, 54, 57, 60, 70, 73, 78, 84, 85, 93, 96]. Surveys were the most common  
124 method of data collection.

125 Program outcomes were largely self-reported and were most often measured using surveys.  
126 The majority of outcomes reported were at level 2A (87.50%), followed by level 1 and level  
127 2B (82.81% each). Far fewer outcomes are reported for levels 4A (20.31%) and 4B (3.12%).  
128 At level 1, fifty three studies assessed participants' reactions [1, 3, 8-12, 14, 15, 17, 22-25, 29,  
129 30, 32, 33, 35, 36, 38-41, 44, 45, 47, 49, 50, 52, 54, 55, 58, 59, 61, 65, 66, 71, 73-76, 78, 81,  
130 84, 85, 87, 90-94, 96]. The majority of participants were satisfied with the programs and rated  
131 them as helpful, relevant and useful in providing an opportunity for sharing with other  
132 educators. For example, Efstathiou et al. [96] reported a significant increase in participants'  
133 satisfaction in five of seven domains related to mentoring. Changes in the attitudes or  
134 perceptions among participants (level 2A) was reported by fifty six articles [1, 3, 8-12, 14, 15,  
135 17, 23-25, 27, 29, 30, 32, 33, 35, 36, 38-42, 45, 47-50, 52, 54, 55, 57-61, 65, 66, 69, 71, 73-76,

136 78, 81, 84, 85, 90, 91, 93-96]. Most programs led to self-reported changes in participants'  
137 attitudes about and perceptions of teaching, learning and mentoring. For example, LeBlanc et  
138 al. [15] reported a significant increase in the level of comfort in participants' ability to facilitate  
139 online case-based discussions; Roos et al. [78] reported that participants felt familiar with  
140 learning theory and expressed their intention to apply the learned educational principles;  
141 Sullivan et al. [61] reported a major improvement in participants' confidence, commitment to  
142 palliative care, and enthusiasm for teaching. 53 articles [1, 3, 8-11, 14, 17, 23-27, 29, 30, 32,  
143 35, 38-41, 44-49, 52, 54, 55, 57-61, 65, 66, 70, 71, 73, 74, 76, 78, 81, 85, 87, 88, 90-95]  
144 evaluated outcomes at level 2B (Modification of knowledge or skills). Most participants  
145 reported gains in knowledge and skills related to teaching-learning process and mentoring with  
146 an emphasis on teaching skills and habits of lifelong learning, providing feedback and the  
147 promotion of reflection. Changes in participants' ability to describe the characteristics of a  
148 student-centered approach to teaching and the roles and responsibilities of a student mentor  
149 were reported in one study [32]. Another study [30] reported an increase in participants'  
150 knowledge of, perceptions of, and implementation of active learning strategies in the didactic  
151 classroom. Participants also significantly improved in their self-perceived humanistic teaching  
152 abilities and mentoring skills over time as assessed by self-report and RN/MD (Registered  
153 Nurse/ Medical Doctor) ratings in two OSTE sessions [93]. Thirty one studies measured  
154 outcome at level 3 [1, 3, 8-10, 12, 22, 24, 25, 32, 35, 38-40, 44, 47, 52, 55, 57, 58, 60, 61, 65,  
155 66, 71, 78, 88, 90-92, 96]. Most programs led to significant improvements in participants' self-  
156 reported use of learner-centered teaching approaches (e.g., development and dissemination of  
157 PBL (Problem-Based Learning) manual) and mentoring skills. Teachers also reported  
158 improvement in their teaching behaviors, specifically in the quality of questions asked and

159 feedback provided [55]. Moreover, several studies reported observed behavioral changes. In  
160 one study [92], although more of the participants attending mini-CEX (mini-clinical evaluation  
161 exercise) workshops provided recommendations as feedback, those without participation spent  
162 more time giving feedback and engaged residents' reflection more often; in another [35], the  
163 independent teacher evaluations by the housestaff and students indicated improvement in  
164 teaching performance of attending physicians. Salerno et al. [44] reported that medical students  
165 observed significant improvements in the quality of verbal feedback delivered in the  
166 ambulatory setting. Changes in the system/organizational practice (level 4A) was reported by  
167 thirteen articles [1, 8, 9, 38-40, 47, 52, 58, 61, 71, 78, 88]. For example, Pinheiro et al. [71]  
168 found that participants reported use of educational concepts and greater participation in the  
169 educational activities of their home institutions. They also reported changes in participants'  
170 perceptions as medical educators and positive impact on the educational process in their home  
171 institutions. Green et al. [58] reported significant improvements in participants' self-reported  
172 ambulatory precepting and primary care genetics skill. Only two studies [1, 47] assessed  
173 change among the participants' students, residents or colleagues (level 4B). One study [47]  
174 provided evidence that a development program for interprofessional mentors working within  
175 a humanistic framework was successful in developing humanistic interprofessional  
176 communities of practice, resulting in both mentors and students experiencing professional and  
177 personal growth and continued professional identity development. In another study [1], the  
178 students reported that the tutorial made a more important contribution to their learning.

179

180 *The teacher as a curriculum developer and implementer*



181 Eighteen of faculty development programs focused on the domain of curriculum developer and  
182 implementer [10, 29, 34, 38-40, 45, 49, 67, 69, 71, 72, 75, 81, 88, 94, 97, 98]. Of these, the  
183 majority were in the form of workshops [34, 39, 45, 69, 72, 75] and longitudinal programs [10,  
184 29, 67, 88, 94, 97] with various durations (n=6, 33.33% each). One of the 18 interventions was  
185 described as a short course [81] and three (16.66%) as a seminar series [38, 40, 49]. In one  
186 study [98], the use of a mentorship program was described. There was also one fellowship  
187 study [71]. Participants in these studies included community-based physician faculty, critical  
188 care faculty, academic podiatric physicians and faculty in medicine, nursing, pharmacy,  
189 dentistry, psychology, nutrition, audiology, physical therapy and occupational therapy as well  
190 as faculty from seven surgical and related disciplines and five medical subspecialties.

191 The majority of study designs reported were single-group and cohort studies with a pre- and  
192 post- test design (38.88% each). Four studies out of 18 were nonrandomised controlled study  
193 with pre-test post-test design [10, 34, 67, 98] and there were no randomized controlled studies.  
194 None of the reports used a qualitative methodology only, though 2 (11.11%) researchers used  
195 a mixed methodology in their work [40, 71].

196 Although most studies (n=9, 50%) used self-report data to assess program outcomes [45, 67,  
197 69, 71, 72, 75, 81, 88, 94], one study [97] used objective data only. In 8 studies, in addition to  
198 self-reported data, objective data sources (e.g., expert opinion, student or resident ratings,  
199 student exam scores, multiple-choice questions (MCQs), CV (Curriculum Vitae) review) were  
200 also used [10, 29, 34, 38-40, 49, 98]. Surveys were the most popular method of data collection.

201 Program outcomes were largely self-reported and were most often measured using surveys.  
202 The majority of outcomes reported were at level 2A and level 2B (83.33% each), followed by

203 level 1 (77.77%) and level 3 (55.55%). Fewer outcomes are reported for level 4A (38.88%).  
204 Only one study reported outcomes for level 4B. At level 1, fourteen studies assessed  
205 participants' reactions [10, 29, 38-40, 45, 49, 67, 71, 75, 81, 94, 97, 98]. As with the other  
206 domains, ratings of satisfaction and perceived usefulness of the programs were high. Most  
207 participants reported that they would recommend the programs highly to others. Changes in  
208 the attitudes or perceptions among participants (level 2A) was reported by fifteen articles [10,  
209 29, 38-40, 45, 49, 67, 69, 71, 72, 75, 81, 94, 97]. Most programs led to significant  
210 improvements in participants' attitudes and perspectives after the educational programs. For  
211 example, Mkony et al. [69] reported an increase in faculty confidence for developing  
212 curriculum; Gates et al. [49] reported significant changes in participants' confidence for a wide  
213 range of academic skills such as curriculum design. In the studies that assessed knowledge and  
214 skills (level 2B), positive results were shown in both [10, 29, 34, 38-40, 45, 49, 67, 71, 72, 81,  
215 88, 94, 97]. One study [10] reported a significant increase in participants' self-assessed  
216 knowledge of quality improvement, patient safety, adult education principles, and curricular  
217 development. Another study [97] reported a significant increase in the number of standard  
218 lesson plans developed by participants Ten studies measured outcome at level 3 [10, 34, 38-  
219 40, 67, 71, 72, 88, 98]. The majority of program outcomes were positive. Windish et al. [98]  
220 reported improvement in self-assessed curricular development, implementation, and  
221 evaluation skills and enjoyment of participants. Authors from one study [34] reported that as a  
222 result of engagement in faculty development programs, 10 faculty members developed 50  
223 instructional Units. Participants in another program incorporated geriatrics teaching into  
224 clinical teaching [40]. Changes in the system/organizational practice (level 4A) was reported  
225 by seven articles [34, 38-40, 71, 72, 88]. For example, a four-year faculty development

226 program to enhance geriatrics learning among house officers in surgical and related disciplines  
227 and medical subspecialties resulted in expanded curricula and teaching activities in geriatrics  
228 in participating departments, and enhanced and altered career trajectories of faculty  
229 participants. Moreover, new rotations were established that included a new month-long rotation  
230 in a geriatrics rehabilitation setting and 4 half-days in geriatrics outpatient settings [40]. Only  
231 one study [34] assessed change among the participants' students, residents or colleagues (level  
232 4B). In this study, students in 9 of the 10 project classes demonstrated significant gains in  
233 knowledge of discipline-based concepts and issues in aging.

234

235 *The teacher as an assessor and diagnostician:*

236 Forty-five of faculty development programs focused on the domain of assessor and  
237 diagnostician [3, 5, 8, 12, 17, 22, 24, 25, 29, 32, 35, 38-46, 49, 55, 58, 60, 63, 65-67, 69, 71,  
238 73, 75, 78, 81, 88, 90-92, 99-105]. Of these, the majority were in the form of workshops (n=18,  
239 40%) with various durations [5, 8, 12, 25, 39, 41-43, 45, 46, 58, 69, 73, 75, 92, 99, 103, 104].  
240 Six (13.33%) of the 45 interventions were described as a short course [22, 55, 78, 81, 91, 101]  
241 and ten as a seminar series [24, 35, 38, 40, 44, 49, 60, 63, 90, 102]. There was one fellowship  
242 study [71]. Nine (20%) were described as a longitudinal program [3, 17, 29, 32, 65-67, 88,  
243 105]. Faculty from the schools of medicine, nursing, pharmacy and dentistry as well as faculty  
244 members from the departments of basic, clinical and allied sciences participated in these  
245 studies.

246 The majority of studies (n=26, 57.77%) used a single-group with a pre- and post- test design  
247 [5, 17, 22, 32, 35, 42, 44-46, 49, 55, 58, 60, 63, 65, 71, 73, 78, 81, 88, 90-92, 101, 102, 105].

248 There were 12 (26.66%) cohort studies with pre-test post-test design [8, 12, 24, 29, 38-41, 43,  
249 66, 69, 75]. Six studies out of 45 were nonrandomised controlled study with pre-test post-test  
250 design [3, 25, 67, 99, 100, 104] and there was only one randomized controlled study [103].  
251 None of the reports used a qualitative methodology only, though seven researchers used a  
252 mixed methodology in their work [40, 43, 44, 60, 71, 91, 105].

253 Twenty-three studies (nearly 51% of reviewed articles) used self-report data to assess program  
254 outcomes [3, 8, 12, 17, 24, 32, 41, 42, 45, 55, 58, 63, 65-67, 69, 71, 75, 81, 88, 90, 91, 100].  
255 Five studies [46, 92, 99, 103, 104] used objective data only. In 17 studies, in addition to self-  
256 reported data, objective data sources (e.g., expert-assessment, student or resident ratings,  
257 student exam scores, multiple-choice questions, CV review) were also used [5, 22, 25, 29, 35,  
258 38-40, 43, 44, 49, 60, 73, 78, 101, 102, 105]. Surveys were the most common method of data  
259 collection.

260 Program outcomes were largely self-reported and were most often measured using surveys.  
261 The majority of outcomes reported were at level 2B (88.88%), followed by level 1 and level  
262 2A (77.77% each) and level 3 (62.22%). Far fewer outcomes are reported for levels 4A (20%).  
263 Only one study reported outcomes for level 4B. At level 1, thirty five studies assessed  
264 participants' reactions. Overall reactions by faculty participants to the programs were  
265 extremely positive. Programs were rated by participants as extremely useful and relevant to  
266 clinical and educational activities. Changes in the attitudes or perceptions among participants  
267 (level 2A) was reported by thirty five articles [3, 5, 8, 12, 17, 24, 25, 29, 32, 35, 38-43, 45, 49,  
268 55, 58, 60, 65-67, 69, 71, 73, 75, 78, 81, 90, 91, 100, 101, 105]. Most programs led to self-  
269 reported changes in participants' self-efficacy and confidence in student assessment. For  
270 example, Griffeth & Wiederman [101] reported statistically significant differences in both the

271 self-rated confidence of faculty members in their ability to accurately rate student performance  
272 and in the actual clinical assessment ratings of students after the intervention. One study [65]  
273 reported significant increases in hospitalist confidence in giving feedback, receiving feedback,  
274 and teaching efficacy. Another study [69] reported increase in faculty confidence to a level  
275 near ‘very confident’ for items related to explaining, teaching, and assessing competencies. 40  
276 articles [3, 5, 8, 17, 24, 25, 29, 32, 35, 38-41, 43-46, 49, 55, 58, 60, 63, 65-67, 71, 73, 78, 81,  
277 88, 90-92, 99-105] evaluated outcomes at level 2B (Modification of knowledge or skills). The  
278 majority of faculty development programs led to significant increases in faculty members’  
279 cognitive knowledge and skills of different aspects of assessment of students’ learning such as  
280 development of MCQs, giving effective feedback and workplace-based assessment. In four  
281 studies [99, 102-104], effective changes in the learning and performances of medical educators  
282 in the development of MCQs were noted. One study [102] reported an improvement to a faculty  
283 member’s confidence in identifying quality and poor MCQ. Another study [105] reported  
284 significant improvements in participants’ feedback quality. Participants also reported an  
285 increase in their ability to describe the characteristics of the components of assessment in  
286 pharmacy education [32]. Twenty eight studies measured outcome at level 3 [3, 5, 8, 12, 22,  
287 24, 25, 32, 35, 38-40, 43, 44, 55, 58, 60, 65-67, 71, 78, 88, 90-92, 100, 101]. Most programs  
288 indicated self-reported behavior changes, with a particular focus on improved feedback process  
289 and MCQ construction. Moreover, several studies reported observed behavioral changes. In  
290 two studies [44, 60], medical students observed significant improvements in the quantity and  
291 quality of verbal and written feedback delivered in the ambulatory setting; in another [92]  
292 enhancement of giving feedback to residents was observed. Another study [43] revealed the  
293 clinical faculty’s evaluation of professional judgment during patient care was enhanced by

294 training. Changes in the system/organizational practice attributable to the educational program  
295 (level 4A) were infrequently noted [8, 38-40, 43, 58, 71, 78, 88]. In one study [71], participants  
296 reported active involvement in the educational processes of their home institutions. In another  
297 study [43], faculty training program enhanced evaluation of students' ethics and  
298 professionalism in the academic clinical setting. Participants also reported that they teach the  
299 concepts and skills they learned during their programs (e.g., evaluation methods, learner  
300 assessment, writing effective test items, giving feedback) to their colleagues [40, 71, 88]. Only  
301 one study reported outcomes for level 4B [43]. In this study, students were more positive in  
302 outcomes assessments about their competency and learning experiences related to  
303 professionalism and ethics.

304

#### 305 *The teacher as a role model*

306 Five of faculty development programs focused on the domain of role model [58, 78, 81, 93,  
307 106]. Of these, the majority were described as a short course with various durations [78, 81,  
308 106]. One of the 5 interventions was in the form of workshops [58]. There was also one  
309 longitudinal program [93]. University-based and community-based general medicine faculty  
310 and as well as a mix of medical educators from multiple schools participated in these studies.

311 The majority of studies (n=3, 60%) used a single-group with a pre- and post- test design [58,  
312 78, 81]. There was only one cohort study with pre-test post-test design [93]. One study out of  
313 5 was nonrandomised controlled study with pre-test post-test design [106]. Two of the  
314 researchers used a mixed methodology in their work [93, 106].

315 Although all studies used self-report data to assess program outcomes [58, 78, 81, 93, 106], in  
316 3 studies, in addition to self-reported data, objective data sources (e.g., expert assessment,  
317 OSTEs, multiple-choice questions) were also used [78, 93, 106]. Questionnaires were the most  
318 popular method of data collection.

319 Program outcomes were largely self-reported and were most often measured using  
320 questionnaires. The majority of outcomes reported were at level 2A (100%), followed by level  
321 1 and level 2B (80% each). No studies reported outcomes for level 4B. All but one report  
322 presented data on the participants' reactions [58, 78, 81, 93]. The majority of participants  
323 agreed or strongly agreed that the program was excellent and that they would highly  
324 recommend the program to their colleagues. All studies evaluated outcomes at level 2A.  
325 Changes in attitudes and perceptions attributable to the educational program were infrequently  
326 noted. In one study [93], high potential mentors in both cohorts perceived significant  
327 improvement in role model skill during the second assessment compared with the first.  
328 Similarly, the standardized RNs/MDs in both cohorts felt that the mentors significantly  
329 improved in role model skill. Two of the five studies collected data relating to level 3 outcomes  
330 [58, 78]. The majority of program outcomes were positive. Authors from one study [58]  
331 reported that as a result of combining clinical content and clinical teaching in faculty  
332 development workshops, a majority of participants fully or partially implemented changes in  
333 their behavior areas within 3 months. In another study [78], participants tried to be an  
334 enthusiastic role model for students and to motivate students to prepare for a complex  
335 profession. Two reports of change at the level of impact on the organizational practices were  
336 found [58, 78]. Roos et al. [78], reported that their teaching education program supported self-  
337 reflection of medical educators in their professional environment, promoted collegiality and

338 collaboration within and across traditional discipline boundaries, and exerted an important  
339 impact on an effective faculty development. No studies assessed change among the  
340 participants' students, residents or colleagues (level 4B).

341

#### 342 *The teacher as a manager and leader*

343 Nineteen of faculty development programs focused on the domain of manager and leader [3,  
344 8-10, 25, 35, 37-39, 45, 49, 53, 75, 78, 88, 94, 107-109]. Of these, the majority were in the  
345 form of workshops (n=7, 36.84%) with various durations [8, 9, 25, 39, 45, 75, 107]. Two  
346 (10.52%) of the 19 interventions were described as a short course [78, 108] and three as a  
347 seminar series [35, 38, 49]. There was only one fellowship study [37]. Six (31.57%) were  
348 described as a longitudinal program [3, 10, 53, 88, 94, 109]. Faculty from the colleges of  
349 medicine, dentistry, nursing and pharmacy and as well as basic science teachers from different  
350 departments and clinical teachers in family medicine, general pediatrics, and general internal  
351 medicine participated in these studies.

352 The majority of studies (n=9, 47.36%) used a single-group with a pre- and post- test design  
353 [35, 37, 45, 49, 78, 88, 94, 107, 109]. There were 7 (36.84%) cohort studies with pre-test post-  
354 test design [8, 9, 38, 39, 53, 75, 108]. Three studies out of 19 were nonrandomised controlled  
355 study with pre-test post-test design [3, 10, 25]. None of the reports used a qualitative  
356 methodology only, though authors from one study used a mixed methodology in their work  
357 [107].

358 Ten studies used self-report data to assess program outcomes [3, 8, 37, 45, 53, 75, 88, 94, 107,  
359 108]. In 9 studies, in addition to self-reported data, objective data sources (e.g., student or



360 resident ratings, student exam scores, multiple-choice questions, peer- and expert-assessment,  
361 CV review) were also used [9, 10, 25, 35, 38, 39, 49, 78, 109]. Surveys were the most common  
362 method of data collection.

363 Program outcomes were largely self-reported and were most often measured using surveys.  
364 The majority of outcomes reported were at level 2B (94.73%), followed by level 1 (89.47%),  
365 level 2A (78.94%) and level 3 (63.15%). Fewer outcomes are reported for level 4A (36.84%).  
366 No studies reported outcomes for level 4B. At level 1, seventeen studies assessed participants'  
367 reactions to the programs [3, 8-10, 25, 35, 37-39, 45, 49, 53, 75, 78, 94, 108, 109]. In all cases,  
368 the overall program was well-rated by participants. They also believed that the content of  
369 programs was appropriate and addressed their learning needs. Impact on attitudes or  
370 perceptions (level 2A) was reported by fifteen articles [3, 8-10, 25, 35, 38, 39, 45, 49, 75, 78,  
371 94, 108, 109]. Self-reported changes in attitudes and perceptions included enhanced self-  
372 efficacy and confidence in collaborative practice, planning and conducting faculty  
373 development programs and leadership and management of work teams. Faculty also reported  
374 improved confidence in proficiency of clinical quality improvement (QI) concepts. 18 articles  
375 evaluated outcomes at level 2B [3, 8-10, 25, 35, 37-39, 45, 49, 53, 78, 88, 94, 107-109]. The  
376 majority of faculty development programs led to significant increases in faculty members'  
377 cognitive knowledge and skills of different aspects of the educational leadership and  
378 management such as time management, change management, small-group leadership,  
379 leadership and management of work teams, educational leadership and hospital administration  
380 and management. Participants also reported an improvement in their clinical leadership skills  
381 and financial skills. In two studies [108, 109], the programs were successful in improving QI  
382 knowledge and skill in key QI components. Another study [107], reported statistically

383 significant changes in participants' knowledge about leadership competencies. Gjerde et al.  
384 [37] reported significant improvement in participants' self-reported leadership/advocacy skills.  
385 Level 3 results reporting changed behavior were presented in twelve articles [3, 8-10, 25, 35,  
386 38, 39, 78, 88, 108, 109]. Most programs led to significant improvements in participants' self-  
387 reported leadership and management behaviors, including improved management  
388 performance, applying team principles and health systems science principles into daily work,  
389 applying QI into teaching and better collaboration with other professionals. In one study [109]  
390 significant improvement was noted in the application of the QI concepts learned during the  
391 program. Participants also were successful in proposing and implementing a QI project. In  
392 another study [8], participants planned and conducted faculty development workshops for  
393 practitioners on basic topics related to office-based precepting (e.g., principles of adult  
394 learning, effective and efficient teaching, evaluation, feedback). Changes in the  
395 system/organizational practice (level 4A) was reported by seven articles [8, 9, 38, 39, 78, 88,  
396 108]. In one study [8], participants reported success in recruiting more community sites for  
397 learners, enhanced relations with community preceptors, and increased formal  
398 acknowledgment of the contributions of community preceptors (through awards, access to  
399 university resources, etc) at their institutions. One participant in this study now leads the  
400 Resident Education and Training Special Interest Group of the American Academy of  
401 Pediatrics' Section on Community Pediatrics, which is developing a "Starter Kit" to assist  
402 practitioners interested in precepting trainees in their offices. Another study reported the  
403 faculty development program achieved its objectives, with participants leading workshops,  
404 impacting faculty development infrastructure, advancing their own careers, and being  
405 strategically positioned in leadership roles with the skills to improve primary care education in

406 the ambulatory setting [9]. Participants also reported working on another QI project utilizing  
407 the tools taught in the course in one study [108]. Rosenbaum et al. [88] reported a substantial  
408 increase in program participants' facilitation of teaching skills workshops and development of  
409 teaching improvement systems within their home departments. No studies reported outcomes  
410 for level 4B.

411

#### 412 *The teacher as a scholar and researcher*

413 Twenty nine of faculty development programs focused on the domain of scholar and researcher  
414 [6, 9, 10, 12, 14, 32, 34, 37-40, 45, 49, 68, 71, 72, 75, 88, 94, 100, 110-118]. Most of these  
415 articles were in the form of workshops (n=10, 34.48%) with various durations [9, 12, 34, 39,  
416 45, 68, 72, 75, 115, 117]. Nearly 10.5% of the 29 interventions were described as a short course  
417 [6, 113, 116] and three as a seminar series [38, 40, 49]. In three studies [14, 111, 114], the use  
418 of a mentorship program was described. There were three fellowship studies [37, 71, 118]. Six  
419 (20.68%) were described as a longitudinal program [10, 32, 88, 94, 110, 112]. Participants in  
420 these studies included faculty from the schools of medicine, dentistry, nursing and pharmacy  
421 and as well as entry level medical teachers and junior/mid-career clinical teachers in family  
422 medicine, general pediatrics, critical care and general internal medicine.

423 The majority of studies (n=16, 55.17%) used a single-group with a pre- and post- test design  
424 [6, 14, 32, 37, 45, 49, 68, 71, 72, 88, 94, 112-114, 117, 118]. There were 9 (31.03%) cohort  
425 studies with pre-test post-test design [9, 12, 38-40, 75, 110, 111, 115]. Four studies out of 29  
426 were nonrandomised controlled study with pre-test post-test design [10, 34, 100, 116]. None

427 of the reports used a qualitative methodology only, though authors from six studies used a  
428 mixed methodology in their work [40, 71, 110, 112, 115, 118].

429 Eighteen studies used self-report data to assess program outcomes [12, 14, 32, 37, 45, 68, 71,  
430 72, 75, 88, 94, 100, 110, 111, 113, 116-118]. In 11 studies, in addition to self-reported data,  
431 objective data sources (e.g., the number of grant submissions, retention rates, or success in  
432 promotion/tenure, the total number of peer reviewed publications by faculty members, CV  
433 review) were also used [6, 9, 10, 34, 38-40, 49, 112, 114, 115]. Surveys were the most common  
434 method of data collection.

435 Program outcomes were largely self-reported and were most often measured using surveys.  
436 The majority of outcomes reported were at level 2B (89.65%), followed by level 1 (79.31%),  
437 level 2A (72.41%) and level 3 (58.62%). Far fewer outcomes are reported for levels 4A  
438 (31.03%) and 4B (3.44%). At level 1, twenty three studies assessed participants' reactions to  
439 the programs [6, 9, 10, 12, 14, 32, 37-40, 45, 49, 68, 71, 75, 94, 100, 110, 112, 114-117]. The  
440 majority of participants were satisfied or highly satisfied with the programs. They also gave  
441 high scores to all components of the faculty development programs. Changes in attitudes and  
442 perceptions attributable to the educational program was reported by twenty one studies [9, 10,  
443 12, 14, 32, 38-40, 45, 49, 71, 72, 75, 94, 100, 110-112, 115-117]. Self-reported changes in  
444 attitudes included greater enthusiasm and motivation as a scholar and researcher, increased  
445 confidence to conduct educational research, and enhanced awareness of the value of a scholarly  
446 approach to teaching. Participants also reported increased understanding of, and intent to try,  
447 evidence-based medicine practice. In one study [45], participants reported that they felt  
448 confident in designing and analyzing education research projects following the program. 26  
449 articles measured outcomes at level 2B [6, 9, 10, 14, 32, 34, 37-40, 45, 49, 68, 71, 72, 88, 94,

450 100, 110-113, 115-118]. The majority of faculty development programs led to significant  
451 improvement in participants' self-reported knowledge and skills of different domains of the  
452 educational research and scholarship of teaching and learning, such as research design, critical  
453 appraisal of the literature, scientific writing, writing grant applications and evidence-based  
454 medicine (EBM). Participants also reported an improvement in their technology/informatics  
455 skills (e.g., search MEDLINE, use filters while searching, read journals on-line). In three  
456 studies [37, 68, 72], participants reported gains in knowledge and skills regarding EBM  
457 practice. Improvement in participants' self-reported before-after competencies in specific  
458 academic skills such as writing, research, and grant writing was noted in one study [39]. In  
459 another study [94], an interactive, seminar-style course using a diverse set of local experts as  
460 instructors improved participants' research skills (e.g., modern clinical trial design and  
461 implementation, critical appraisal of medical literature, statistical evaluation and modeling of  
462 biomedical data, development and submission of a successful grant proposal). Srivastava et al.  
463 [118] reported knowledge gained during fellowship program helped participants in guiding  
464 educational research at their workplaces. Reader et al. [115] reported an increase in  
465 participants' confidence, knowledge and skills in educational scholarship and dissemination.  
466 Level 3 results reporting changed behavior were presented in seventeen articles [6, 9, 10, 12,  
467 32, 34, 38-40, 71, 72, 88, 100, 110, 112, 114, 117]. Self-reported behavior changes included  
468 increased educational research activities and grant applications, improved critical appraisal of  
469 medical literature, use of evidence-based medicine in practice, use of scholarly approach in  
470 teaching-learning process and greater involvement in educational scholarship programs. One  
471 study [34] reported an increase in research and scholarly activity in the area of aging by faculty  
472 participants. Another study [72], reported an improvement in participants' self-reported EBM

473 practice and EBM teaching skills and, within 3 months, fully or partially implemented many  
474 changes in their clinical practice. Manwell et al. [6] reported that an interdisciplinary faculty  
475 development program led to an increase in faculty research activities in the alcohol area. In  
476 their study, 36% of the participants reported conducting research. There was also an  
477 improvement in self-reported competencies in medical education literature critical appraisal  
478 and behaviors related to the use of evidence in educational practice [100]. Moreover, several  
479 studies reported observed behavioral changes. In one study [6], 10% of the participants had  
480 submitted manuscripts for publication and 12% had submitted grant applications. In another  
481 [114], significant increases in the total number of peer-reviewed publications for junior faculty  
482 protégés were observed, but there were non-significant improvements in the protégés' number  
483 of grant submissions, retention rates, or success in promotion/tenure. Nine reports of change  
484 at the level of impact on the organization were found [9, 34, 38-40, 71, 72, 88, 110]. Three  
485 studies [38, 39, 110], reported significant, positive changes in program completers'  
486 competence, national leadership/ membership positions, national presentations, and peer-  
487 reviewed publications, as well as enhanced retention in academic medicine. In one study [38],  
488 two years after faculty development program completion, 80% of program completers were  
489 retained in full-time academic positions, either locally or nationally. In another study [88],  
490 postprogram, education-related scholarship also increased as compared to preprogram  
491 activities. Specifically, there was a substantial increase in the number of education-related  
492 publications and education-related presentations at regional and national meetings. In addition,  
493 scholars had increased participation in national educational organizations including attending  
494 meetings and membership on committees. Other institutional changes included establishing an  
495 educational research group, cross-institutional collaboration and increased emphasis on

496 educational scholarship in promotion/tenure at medical school [9]. Only one study [34]  
497 assessed change among the participants' students, residents or colleagues (level 4B). In this  
498 study, faculty members and their students developed a research agenda to investigate topics in  
499 aging.

500

501 *The teacher as a professional*

502 Twenty four of faculty development programs focused on the domain of professional [3, 10,  
503 12, 14, 17, 19, 38, 40, 45, 47, 49, 61, 64, 70, 71, 78, 88, 93-95, 106, 111, 117, 119]. Most of  
504 these articles (n=9, 37.5%) were in the form of longitudinal program [3, 10, 17, 61, 88, 93-95,  
505 119]. Four (16.66%) were described as workshops with various durations [12, 45, 64, 117].  
506 Nearly 16.5% of the 24 interventions were described as a short course [19, 70, 78, 106] and  
507 three as a seminar series [38, 40, 49]. In three studies [14, 47, 111], the use of a mentorship  
508 program was described. There was only one fellowship study [71]. A mix of professions,  
509 including medicine, nursing, pharmacy, dentistry, physical therapy, occupational therapy and  
510 speech-language pathology as well as junior/mid-career clinical faculty members and  
511 community-based physician faculty participated in these studies.

512 The majority of studies (n=15, 62.5%) used a single-group with a pre- and post- test design  
513 [14, 17, 19, 45, 47, 49, 64, 70, 71, 78, 88, 94, 95, 117, 119]. There were 6 (one fourth of the  
514 studies reviewed) cohort studies with pre-test post-test design [12, 38, 40, 61, 93, 111]. Three  
515 studies out of 24 were nonrandomised controlled study with pre-test post-test design [3, 10,  
516 106]. One author employed a qualitative methodology only [64], though 5 (20.83%)  
517 researchers used a mixed methodology in their work [40, 47, 71, 93, 106].

518 More than half of the studies (54.16%) used self-report data to assess program outcomes [3,  
519 12, 14, 17, 19, 45, 61, 71, 88, 94, 95, 111, 117]. In 11 studies, in addition to self-reported data,  
520 objective data sources (e.g., retention rates, or success in promotion/tenure, engagement index,  
521 CV review) were also used [10, 38, 40, 47, 49, 64, 70, 78, 93, 106, 119]. Surveys were the  
522 most common method of data collection.

523 Program outcomes were largely self-reported and were most often measured using surveys.  
524 The majority of outcomes reported were at level 2A (87.5%), followed by level 2B (83.33%),  
525 level 1 (75%) and level 3 (58.33%). Fewer outcomes were reported for levels 4A (29.16%)  
526 and 4B (4.16%). Where reaction was assessed [3, 10, 12, 14, 17, 38, 40, 45, 47, 49, 61, 64, 71,  
527 78, 93, 94, 117, 119], many program components were found to be of value: the interaction  
528 with colleagues and peers; the instructional design used and the creation of positive learning  
529 environments. Changes in attitudes and perceptions attributable to the educational program  
530 was reported by twenty one studies [3, 10, 12, 14, 17, 19, 38, 40, 45, 47, 49, 61, 64, 71, 78, 93-  
531 95, 106, 111, 117]. Self-reported changes in attitudes included greater enthusiasm and  
532 motivation for lifelong learning, development or strengthening of responsibility for teaching,  
533 and an increased sense of community and collegiality. Participants also reported an increased  
534 understanding of individual professional development, career development, professional  
535 responsibility and interpersonal relationships. 20 articles measured outcomes at level 2B [3,  
536 10, 14, 17, 19, 38, 40, 45, 47, 49, 61, 70, 71, 78, 88, 93-95, 111, 117]. The majority of faculty  
537 development programs led to significant improvement in participants' self-reported  
538 knowledge, skills, and attitudes in the domains of professional development and scholarship,  
539 including the ability to write career goals, align activities with those goals and in the number  
540 of and amount of time spent pursuing activities related to those goals. Participants also reported



541 an improvement in their professional skills (e.g., setting career goals and career planning,  
542 obtaining work-life balance, assessing professional development needs, resolving conflict and  
543 negotiation, writing curriculum vitae and portfolio development). Baker et al. [95] reported  
544 significant improvements in the areas of knowledge, skills, community, and feelings of success  
545 and confidence about the principles of IPE (Interprofessional Education) and faculty  
546 development. Improvements in meeting faculty needs related to professional development,  
547 individual feedback and career development were noted in one study [14]. In another study  
548 [94], a novel broad-based career development course improved professional skills of critical  
549 care medicine trainees (e.g., balancing personal and professional life, identification and  
550 prevention of burnout, developing a curriculum vitae). Gates et al. [49] reported an increase in  
551 participants' knowledge and skills in legal issues in the educational environment. Fourteen of  
552 the twenty-four studies gathered data on level 3 outcomes [3, 10, 12, 19, 38, 40, 47, 61, 64, 71,  
553 78, 88, 117, 119]. Most participants expressed intention to change their behavior as a result of  
554 participating in the programs. Researchers from one study [119] reported that as a result of  
555 engagement in a faculty development program, qualitative and quantitative metrics for  
556 engagement and professional growth improved dramatically during the implementation period.  
557 In this study, faculty development program resulted in more highly engaged and productive  
558 faculty members who were more likely to remain long term within the college. Another study  
559 [19], reported an improvement in participants' ability to manage professional relationships.  
560 Additionally, faculty members described beneficial effects in their individual professional  
561 development, development of a shared mental model of professional responsibility, and  
562 interpersonal relationships [64]. In one study [12], participants reported that the greatest  
563 changes in their current teaching practices occurred in their ability to design, implement, and

564 evaluate a course of instruction, thus increasing their perceptions of progress as a faculty  
565 member. In another [3], program participants had significantly greater pre–post-change scores  
566 than nonparticipants for professional outcomes (e.g., self-directed learning, working in groups,  
567 time management, and administration). Seven studies reported changes at the institutional level  
568 [38, 40, 47, 61, 71, 78, 88]. In one study [61], program participants reported increases in  
569 proportion of time spent in palliative care practice. Participants also reported having  
570 accomplished palliative care-related professional development activities since course  
571 completion (e.g., additional training, application for certification, grant submission). In another  
572 study [78], teaching performance ratings improved in students’ evaluations. Changes in  
573 participants’ perceptions as medical educators and positive impact on the educational process  
574 in their home institutions were noted in one study [71]. Other institutional changes included  
575 enhanced retention of program completers in academic medicine and increased professional  
576 participation and use of professional academic skills among participants in the educational  
577 activities of their home institutions. Only one study [47] assessed change among the  
578 participants’ students, residents or colleagues (level 4B). This study led to the development of  
579 humanistic interprofessional communities of practice, resulted in both mentors and students  
580 experienced professional and personal growth and continued professional identity  
581 development.

582

## 583 **References**

- 584 1. Shields HM, Guss D, Somers SC, Kerfoot BP, Mandell BS, Travassos WJ, Ullman SM,  
585 Maroo S, Honan JP, Raymond LW *et al*: **A faculty development program to train**  
586 **tutors to be discussion leaders rather than facilitators.** *Acad Med* 2007, **82**(5):486-  
587 492.

- 588 2. Sherbino J, Frank J, Lee C, Bandiera G: **Evaluating "ED STAT!": A Novel and**  
589 **Effective Faculty Development Program to Improve Emergency Department**  
590 **Teaching.** *Academic Emergency Medicine* 2006, **13**(10):1062-1069.
- 591 3. Cole KA, Barker LR, Kolodner K, Williamson P, Wright SM, Kern DE: **Faculty**  
592 **Development in Teaching Skills: An Intensive Longitudinal Model.** *Academic*  
593 *Medicine* 2004, **79**(5):469-480.
- 594 4. Evans KH, Bereknyei S, Hikoyeda N, Tzuang M, Braddock CH: **The impact of a faculty**  
595 **development program in health literacy and ethnogeriatrics.** *Academic Medicine*  
596 2014, **89**(12):1640-1644.
- 597 5. Quirk ME, DeWitt T, Lasser D, Huppert M, Hunniwell E: **Evaluation of primary care**  
598 **utures: A faculty development program for community health center preceptors.**  
599 *Academic medicine* 1998, **73**(6):705-707.
- 600 6. Manwell LB, Pfeifer J, Stauffacher EA: **An interdisciplinary faculty development**  
601 **model for the prevention and treatment of alcohol use disorders.** *Alcoholism: Clinical*  
602 *and Experimental Research* 2006, **30**(8):1393-1399.
- 603 7. Lye P, Heidenreich C, Wang-Cheng R, Bragg D, Simpson D: **Experienced clinical**  
604 **educators improve their clinical teaching effectiveness.** *Ambulatory Pediatrics* 2003,  
605 **3**(2):93-97.
- 606 8. Roberts KB, Devries JM: **APA/HRSA National Faculty Development Scholars**  
607 **Program: Community-Based Teaching Track.** *Ambulatory Pediatrics* 2004, **4**(1  
608 SUPPL.):92-97.
- 609 9. Simpson DE, Bragg D, Biernat K, Treat R: **Outcomes results from the evaluation of**  
610 **the APA/HRSA Faculty Scholars Program.** *Ambulatory Pediatrics* 2004, **4**(1  
611 SUPPL.):103-112.
- 612 10. Walsh DS, Lazorick S, Lawson L, Lake D, Garrison HG, Higginson J, Vos P, Baxley E:  
613 **The Teachers of Quality Academy: Evaluation of the Effectiveness and Impact of a**  
614 **Health Systems Science Training Program.** *American Journal of Medical Quality*  
615 2019, **34**(1):36-44.
- 616 11. Skeff KM, Stratos GA, Bergen MR, Sampson K, Deutsch SL: **Regional teaching**  
617 **improvement programs for community-based teachers.** *American Journal of*  
618 *Medicine* 1999, **106**(1):76-80.
- 619 12. Mitcham MD, Lancaster CJ, Stone BM: **Evaluating the effectiveness of occupational**  
620 **therapy faculty development workshops.** *American Journal of Occupational Therapy*  
621 2002, **56**(3):335-339.
- 622 13. Assemi M, Mutha S, Hudmon KS: **Evaluation of a train-the-trainer program for**  
623 **cultural competence.** *American Journal of Pharmaceutical Education* 2007, **71**(6).
- 624 14. Haines SL, Popovich NG: **Engaging external senior faculty members as faculty**  
625 **mentors.** *American Journal of Pharmaceutical Education* 2014, **78**(5):1-6.
- 626 15. LeBlanc JM, Pruchnicki MC, Rohdieck SV, Khurma A, Dasta JF: **An instructional**  
627 **seminar for online case-based discussions.** *American Journal of Pharmaceutical*  
628 *Education* 2007, **71**(3).
- 629 16. Lee KC, Ma JD, Hudmon KS, Kuo GM: **A train-the-trainer approach to a shared**  
630 **pharmacogenomics curriculum for US colleges and schools of pharmacy.** *American*  
631 *Journal of Pharmaceutical Education* 2012, **76**(10):1-8.
- 632 17. Popovich NG, Peverly SL, Jackson TR: **Effectiveness of a weekly faculty conversation**  
633 **forum about teaching.** *American Journal of Pharmaceutical Education* 2006, **70**(5):1-7.

- 634 18. S.M S, B.S F, S.E D, L.G M: **A 1-day course to improve the teaching effectiveness of**  
635 **health professions faculty members.** *American journal of pharmaceutical education*  
636 2012, **76**(1):1-9.
- 637 19. Shealy SC, Worrall CL, Baker JL, Grant AD, Fabel PH, Walker CM, Ziegler B, Maxwell  
638 WD: **Assessment of a faculty and preceptor development intervention to foster self-**  
639 **awareness and self-confidence.** *American Journal of Pharmaceutical Education* 2019,  
640 **83**(7):1534-1546.
- 641 20. Paige JT, Arora S, Fernandez G, Seymour N: **Debriefing 101: Training faculty to**  
642 **promote learning in simulation-based training.** *American Journal of Surgery* 2015,  
643 **209**(1):126-131.
- 644 21. Wong JG, Son D, Miura W: **Cross-Cultural Interprofessional Faculty Development in**  
645 **Japan: Results of an Integrated Workshop for Clinical Teachers.** *American Journal*  
646 *of the Medical Sciences* 2017, **354**(6):597-602.
- 647 22. Gardner AK, Timberlake MD, Dunkin BJ: **Faculty Development for the Operating**  
648 **Room: An Examination of the Effectiveness of an Intraoperative Teaching Course**  
649 **for Surgeons.** *Annals of Surgery* 2019, **269**(1):184-190.
- 650 23. Davis BP, Clevenger CK, Posnock S, Robertson BD, Ander DS: **Teaching the teachers:**  
651 **Faculty development in inter-professional education.** *Applied Nursing Research* 2015,  
652 **28**(1):31-35.
- 653 24. Skeff KM, Stratos GA, Berman J, Bergen MR: **Improving clinical teaching. Evaluation**  
654 **of a national dissemination program.** *Archives of internal medicine* 1992, **152**(6):1156-  
655 1161.
- 656 25. Ebrahimi S, Kojuri J: **Assessing the impact of faculty development fellowship in**  
657 **Shiraz University of medical sciences.** *Archives of Iranian Medicine* 2012, **15**(2):79-81.
- 658 26. Lye PS, Simpson DE, Wendelberger KJ, Bragg DS: **Clinical teaching rounds. A case-**  
659 **oriented faculty development program.** *Archives of pediatrics & adolescent medicine*  
660 1998, **152**(3):293-295.
- 661 27. Junod Perron N, Nendaz M, Louis-Simonet M, Sommer J, Gut A, Cerutti B, Van Der  
662 Vleuten CP, Dolmans D: **Impact of postgraduate training on communication skills**  
663 **teaching: A controlled study.** *BMC Medical Education* 2014, **14**(1):1-12.
- 664 28. Nasmith L, Franco ED: **Minor surgical procedures: Faculty development workshop.**  
665 *Canadian Family Physician* 1997, **43**(APR.):715-718.
- 666 29. Lemoine JB, Chauvin SW, Broussard L, Oberleitner MG: **Statewide interprofessional**  
667 **faculty development in simulation-based education for health professions.** *Clinical*  
668 *Simulation in Nursing* 2015, **11**(3):153-162.
- 669 30. Davis TS, Desselle SP: **Perceptions of a faculty cohort using education scholar as a**  
670 **basis for faculty development in active learning strategies.** *Currents in Pharmacy*  
671 *Teaching and Learning* 2013, **5**(5):394-401.
- 672 31. Sturpe DA, Layson-Wolf C, Lynn McPherson M, Haines ST: **An objective structured**  
673 **teaching examination (OSTE) for faculty development.** *Currents in Pharmacy*  
674 *Teaching and Learning* 2013, **5**(6):616-619.
- 675 32. Zagar M, Sampognaro L, Robertson C, Craft G: **A description and opinions of a**  
676 **longitudinal book club for comprehensive pharmacy faculty development.** *Currents*  
677 *in Pharmacy Teaching and Learning* 2019, **11**(9):909-914.
- 678 33. Thampy H, Bond K: **Sharing experiences of clinical teaching: An evaluation of**  
679 **contrasting workshops.** *Education for Primary Care* 2016, **27**(4):320-321.

- 680 34. Batsche CN, Monoson PK: **A FOUR-PHASE MULTIDISCIPLINARY FACULTY**  
681 **DEVELOPMENT MODEL IN AGING.** *Educational Gerontology* 1993, **19**(6):551-  
682 567.
- 683 35. Skeff KM, Stratos GA, Bergen MR: **Evaluation of a Medical Faculty Development**  
684 **Program: A Comparison of Traditional Pre/Post and Retrospective Pre/Post Self-**  
685 **Assessment Ratings.** *Evaluation & the Health Professions* 1992, **15**(3):350-366.
- 686 36. Delver H, Jackson W, Lee S, Palacios M: **FM POD: An evidence-based blended**  
687 **teaching skills program for rural preceptors.** *Family Medicine* 2014, **46**(5):369-377.
- 688 37. Gjerde CL, Kokotailo P, Olson CA, Hla KM: **A Weekend Program Model for Faculty**  
689 **Development with Primary Care Physicians.** *Family Medicine* 2004, **36**(SUPPL.):110-  
690 114.
- 691 38. Morzinski JA, Simpson DE: **Outcomes of a comprehensive faculty development**  
692 **program for local, full-time faculty.** *Family medicine* 2003, **35**(6):434-439.
- 693 39. Rust G, Taylor V, Herbert-Carter J, Smith QT, Earles K, Kondwani K: **The morehouse**  
694 **faculty development program: Evolving methods and 10-year outcomes.** *Family*  
695 *Medicine* 2006, **38**(1):43-49.
- 696 40. Williams BC, Schigelone AR, Fitzgerald JT, Halter JB: **Successful implementation of a**  
697 **faculty development program in geriatrics for non-primary care physician**  
698 **educators.** *Gerontology and Geriatrics Education* 2008, **28**(3):5-27.
- 699 41. Kuhnigk O, Schreiner J, Harendza S: **Sustained change in didactic skills--does teacher**  
700 **training last?** *GMS Zeitschrift für medizinische Ausbildung* 2013, **30**(3):Doc37-Doc37.
- 701 42. Garner SL, Killingsworth E, Bradshaw M, Raj L, Johnson SR, Abijah SP, Parimala S,  
702 Victor S: **The impact of simulation education on self-efficacy towards teaching for**  
703 **nurse educators.** *International Nursing Review* 2018, **65**(4):586-595.
- 704 43. Christie C, Bowen D, Paarmann C: **Effectiveness of faculty training to enhance clinical**  
705 **evaluation of student competence in ethical reasoning and professionalism.** *J Dent*  
706 *Educ* 2007, **71**(8):1048-1057.
- 707 44. Salerno SM, Malley PGO, Pangaro LN, Wheeler GA, Moores LK, Jackson JL:  
708 **Preceptor Improve Feedback in the Ambulatory Setting.** *J Gen Intern Med* 2002,  
709 **17**:779-787.
- 710 45. Kesselheim JC, Clayton CP, Fritz J, Smith RE, Gitlin SD, Reid E, Zuckerman KS, Kahn  
711 MJ: **The American Society of Hematology (ASH) Medical Educators Institute: a**  
712 **Pilot Faculty Development Project for Hematology Educators.** *Journal of Cancer*  
713 *Education* 2019, **34**(4):719-724.
- 714 46. Mokkapati A, Mada P: **Effectiveness of a teacher training workshop: An**  
715 **interventional study.** *Journal of Clinical and Diagnostic Research* 2018, **12**(2):JC09-  
716 JC12.
- 717 47. Blatt B, Plack MM, Simmens SJ: **Preparing interprofessional faculty to be humanistic**  
718 **mentors for medical students: The GW-gold mentor development program.** *Journal*  
719 *of Continuing Education in the Health Professions* 2018, **38**(2):117-125.
- 720 48. Arnett M, Korte D, Richards PS, Saglik B, Taichman LS, Kinney JS, Gwozdek AE:  
721 **Effect of Faculty Development Activities on Dental Hygiene Faculty Perceptions of**  
722 **and Teaching About Motivational Interviewing: A Pilot Study.** *Journal of Dental*  
723 *Education* 2017, **81**(8):969-977.

- 724 49. Gates P, Ubu N, Smithey L, Rogers J, Haden NK, Rodriguez T, Albino JEN, Evans C,  
725 Zarkowski P, Weinstein G *et al*: **Faculty Development for Underrepresented Minority**  
726 **Dental Faculty and Residents**. *Journal of Dental Education* 2013, **77**(3):276-291.
- 727 50. Johnstone-Dodge V, Bowen DM, Calley KH, Peterson TS: **A Faculty Development**  
728 **Course to Enhance Dental Hygiene Distance Education: A Pilot Study**. *Journal of*  
729 *Dental Education* 2014, **78**(9):1319-1330.
- 730 51. McAndrew M, Eidtson WH, Pierre GC, Gillespie CC: **Creating an Objective**  
731 **Structured Teaching Examination to Evaluate a Dental Faculty Development**  
732 **Program**. *Journal of Dental Education* 2012, **76**(4):461-471.
- 733 52. McAndrew M, Motwaly S, Kamens TE: **Long-Term Follow-Up of a Dental Faculty**  
734 **Development Program**. *Journal of Dental Education* 2013, **77**(6):716-722.
- 735 53. Sabato E, DeCastro JE, Fenesy K: **An Innovative, Comprehensive Faculty**  
736 **Recruitment and Development Program at One U.S. Dental School: Early Results**.  
737 *Journal of Dental Education* 2017, **81**(6):649-657.
- 738 54. Tricio JA, Montt JE, Ormeño AP, Del Real AJ, Naranjo CA: **Impact of Faculty**  
739 **Development Workshops in Student-Centered Teaching Methodologies on Faculty**  
740 **Members' Teaching and Their Students' Perceptions**. *Journal of Dental Education*  
741 2017, **81**(6):675-684.
- 742 55. Berbano EP, Browning R, Pangaro L, Jackson JL: **The impact of the Stanford Faculty**  
743 **Development Program on ambulatory teaching behavior**. *Journal of General Internal*  
744 *Medicine* 2006, **21**(5):430-434.
- 745 56. Bigby J, Barnes HN: **Evaluation of a faculty development program in substance**  
746 **abuse education**. *Journal of General Internal Medicine* 1993, **8**(6):301-305.
- 747 57. Eckstrom E, Homer L, Bowen JL: **Measuring outcomes of a one-minute preceptor**  
748 **faculty development workshop**. *Journal of General Internal Medicine* 2006, **21**(5):410-  
749 414.
- 750 58. Green ML, Gross CP, Kernan WN, Wong JG, Holmboe ES: **Integrating teaching skills**  
751 **and clinical content in a faculty development workshop**. *Journal of General Internal*  
752 *Medicine* 2003, **18**(6):468-474.
- 753 59. Hatem DS, Barrett SV, Hewson M, Steele D, Purwono U, Smith R: **Teaching the**  
754 **medical interview: Methods and key learning issues in a faculty development course**.  
755 *Journal of General Internal Medicine* 2007, **22**(12):1718-1724.
- 756 60. Salerno SM, Jackson JL, O'Malley PG: **Interactive Faculty Development Seminars**  
757 **Improve the Quality of Written Feedback in Ambulatory Teaching**. *Journal of*  
758 *General Internal Medicine* 2003, **18**(10):831-834.
- 759 61. Sullivan AM, Lakoma MD, Billings JA, Peters AS, Block SD, Faculty PC: **Creating**  
760 **enduring change: demonstrating the long-term impact of a faculty development**  
761 **program in palliative care**. *Journal of general internal medicine* 2006, **21**(9):907-914.
- 762 62. Willett LR: **Brief report: Utilizing an audiotape for outpatient preceptor faculty**  
763 **development**. *Journal of General Internal Medicine* 2006, **21**(5):503-505.
- 764 63. Weppner WG, Fisher AK, Hagman M, Inouye L, King I, Smith CS, Wilper AP, Knight  
765 CL: **Taking SGIM's Teaching Educators Across the Continuum of Health Care on**  
766 **the Road-A Local, Interprofessional Faculty Development Innovation**. *Journal of*  
767 *graduate medical education* 2017, **9**(3):378-379.

- 768 64. Lang VJ, O'Connor AB, Blatt A, Gracey C: **Collaborative development of teaching**  
769 **scripts: An efficient faculty development approach for a busy clinical teaching unit.**  
770 *Journal of Hospital Medicine* 2012, **7**(8):644-648.
- 771 65. Mookherjee S, Monash B, Wentworth KL, Sharpe BA: **Faculty development for**  
772 **hospitalists: Structured peer observation of teaching.** *Journal of Hospital Medicine*  
773 2014, **9**(4):244-250.
- 774 66. Podrazik PM, Levine S, Smith S, Scott D, DuBeau CE, Baron A, Whelan C, Johnson J,  
775 Cook S, Arora V *et al*: **The curriculum for the hospitalized aging medical patient**  
776 **program: A collaborative faculty development program for hospitalists, general**  
777 **internists, and geriatricians.** *Journal of Hospital Medicine* 2008, **3**(5):384-393.
- 778 67. Coogle CL, Hackett L, Owens MG, Ansello EF, Mathews JH: **Perceived self-efficacy**  
779 **gains following an interprofessional faculty development programme in geriatrics**  
780 **education.** *Journal of Interprofessional Care* 2016, **30**(4):483-492.
- 781 68. Koffel J, Reidt S: **An interprofessional train-the-trainer evidence-based practice**  
782 **workshop: Design and evaluation.** *Journal of Interprofessional Care* 2015, **29**(4):367-  
783 369.
- 784 69. Mkony CA, O'Sullivan PS, Owibingire SS, Fyfe MV, Omer S, Freeman P, Makubi A,  
785 Mloka DA, Portillo CJ, Leyna GH *et al*: **Teaching and educational scholarship in**  
786 **Tanzania: Faculty initiative to improve performance of health professions' students.**  
787 *Journal of Public Health Policy* 2012, **33**(SUPPL.1).
- 788 70. Sigalet EL, Davies JL, Scott EA, Brisseau GF, Shumway JB, Blackie BJ: **Designing**  
789 **interprofessional simulation based faculty development in a new women and**  
790 **children's hospital in the Middle East: A pilot study.** *Journal of Taibah University*  
791 *Medical Sciences* 2016, **11**(6):594-600.
- 792 71. Pinheiro SO, Liechty DK, Busch KV, Johnson ES, Dora DL, Butler RM: **Institutional**  
793 **impact of a part-time faculty development fellowship program for osteopathic**  
794 **community-based physicians.** *The Journal of the American Osteopathic Association*  
795 2002, **102**(11):637-642.
- 796 72. Green ML: **A train-the-trainer model for integrating evidence-based medicine**  
797 **training into podiatric medical education.** *Journal of the American Podiatric Medical*  
798 *Association* 2005, **95**(5):497-504.
- 799 73. Baral N, Nepal AK, Paudel BH, Lamsal M: **Effect of teachers training workshop**  
800 **outcomes on real classroom situations of undergraduate medical students.**  
801 *Kathmandu University Medical Journal* 2015, **13**(50):162-166.
- 802 74. Baral N, Paudel BH, Das BKL, Aryal M, Gautam A, Lamsal M: **Preparing tutors for**  
803 **problem-based learning: An experience from B. P. Koirala Institute of Health**  
804 **Sciences, Nepal.** *Kathmandu University Medical Journal* 2010, **8**(29):141-145.
- 805 75. Yoon HB, Shin JS, Lee SH, Kim DH, Sung M, Amgalan N, Chinzorig T: **Transnational**  
806 **collaboration for faculty development in health professions education in Mongolia.**  
807 *Korean Journal of Medical Education* 2016, **28**(4):381-390.
- 808 76. Pololi LH, Frankel RM: **Humanising medical education through faculty**  
809 **development: Linking self-awareness and teaching skills.** *Medical Education* 2005,  
810 **39**(2):154-162.
- 811 77. Wong JG, Agisheva K: **Developing teaching skills for medical educators in Russia: A**  
812 **cross-cultural faculty development project.** *Medical Education* 2007, **41**(3):318-324.

- 813 78. Roos M, Kadmon M, Kirschfink M, Koch E, Jünger J, Strittmatter-Haubold V, Steiner T:  
814 **Developing medical educators - A mixed method evaluation of a teaching education**  
815 **program.** *Medical Education Online* 2014, **19**(1):1-8.
- 816 79. Smith MA, Cherazard R, Fornari A, Adelman P, Snopkowski M, Lesser M: **A unique**  
817 **approach to faculty development using an Observed Structured Teaching**  
818 **Encounter (OSTE).** *Medical Education Online* 2018, **23**(1):1-5.
- 819 80. Schaefer EW, Wayne DB, McGaghie WC, Kozmic SE, Grais IM, Butter J: **Impact of**  
820 **Cardiac Physical Examination Faculty Development on Medical Student**  
821 **Performance: A Randomized Trial.** *Medical Science Educator* 2014, **24**(2):165-172.
- 822 81. Chung HS, Issenberg SB, Phrampus P, Miller G, Mo Je S, Ho Lim T, Min Kim Y: **The**  
823 **impact of an international faculty development program on simulation-based**  
824 **healthcare education.** *Medical Teacher* 2012, **34**(6):510-510.
- 825 82. Johansson J, Skeff K, Stratos G: **Clinical teaching improvement: The transportability**  
826 **of the Stanford Faculty Development Program.** *Medical Teacher* 2009, **31**(8).
- 827 83. Johansson J, Skeff KM, Stratos GA: **A randomised controlled study of role play in a**  
828 **faculty development programme.** *Medical Teacher* 2012, **34**(2).
- 829 84. Rodrigue C, Seoane L, Gala RB, Piazza J, Amedee RG: **Implementation of a faculty**  
830 **development curriculum emphasizing quality improvement and patient safety:**  
831 **Results of a qualitative study.** *Ochsner Journal* 2013, **13**(3):319-321.
- 832 85. Lee WW, Alkureishi ML, Isaacson JH, Mayer M, Frankel RM, London DA, Wroblewski  
833 KE, Arora VM: **Impact of a brief faculty training to improve patient-centered**  
834 **communication while using electronic health records.** *Patient Education and*  
835 *Counseling* 2018, **101**(12):2156-2161.
- 836 86. Perron NJ, Cullati S, Hudelson P, Nendaz M, Dolmans D, Van Der Vleuten C: **Impact of**  
837 **a faculty development programme for teaching communication skills on**  
838 **participants' practice.** *Postgraduate Medical Journal* 2014, **90**(1063):245-250.
- 839 87. Wong JG, Holmboe ES, Jara GB, Martin J, Becker WC, Fiellin DA: **Faculty**  
840 **development in small-group teaching skills associated with a training course on**  
841 **office-based treatment of opioid dependence.** *Substance Abuse* 2004, **25**(4):35-40.
- 842 88. Rosenbaum ME, Lench S, Ferguson KJ: **Outcomes of a teaching scholars program to**  
843 **promote leadership in faculty development.** *Teaching and Learning in Medicine* 2005,  
844 **17**(3):247-252.
- 845 89. Wong JG, Agisheva K: **Cross-cultural faculty development: Initial report of an**  
846 **American/Russian experience.** *Teaching and Learning in Medicine* 2004, **16**(4):376-  
847 380.
- 848 90. Wong JG, Fang Y: **Improving Clinical Teaching in China: Initial Report of a**  
849 **Multihospital Pilot Faculty Development Effort.** *Teaching and Learning in Medicine*  
850 2012, **24**(4):355-360.
- 851 91. Phillips C, Bassell K, Fillmore L: **Transforming nursing education through clinical**  
852 **faculty development.** *Teaching and Learning in Nursing* 2019, **14**(1):47-53.
- 853 92. Liao KC, Pu SJ, Liu MS, Yang CW, Kuo HP: **Development and implementation of a**  
854 **mini-clinical evaluation exercise (mini-CEX) program to assess the clinical**  
855 **competencies of internal medicine residents: From faculty development to**  
856 **curriculum evaluation.** *BMC Medical Education* 2013, **13**(1):1-1.
- 857 93. Fornari A, Torte LM, Lay M, Hirsch B, Tanzi D, Friedman I, Ricardo AP, Pekmezaris  
858 R, Branch W: **A mixed-methods approach to humanistic interprofessional faculty**



- 859 **development.** *Journal of Continuing Education in the Health Professions* 2018,  
860 **38(1):66-72.**
- 861 94. Moore JE, Pinsky MR: **Faculty development for fellows: Developing and evaluating a**  
862 **broad-based career development course for critical care medicine trainees.** *Journal*  
863 *of Critical Care* 2015, **30(5):1152.e1151-1152.e1156.**
- 864 95. Baker L, Egan-Lee E, Leslie K, Silver I, Reeves S: **Exploring an IPE faculty**  
865 **development program using the 3-P model.** *Journal of Interprofessional Care* 2010,  
866 **24(5):597-600.**
- 867 96. Efstathiou JA, Drumm MR, Paly JP, Lawton DM, O'Neill RM, Niemierko A, Leffert LR,  
868 Loeffler JS, Shih HA: **Long-term impact of a faculty mentoring program in academic**  
869 **medicine.** *PLoS ONE* 2018, **13(11):1-12.**
- 870 97. Safavi A, Sadeghi A: **Reconstructing Academic Staff Development Program: by**  
871 **Implementing a Supervised and Feedback on Experience Strategy in Order to**  
872 **Improve Their Teaching Skills in lesson Planning %J Bimonthly of Education**  
873 **Strategies in Medical Sciences.** 2017, **10(5):358-363.**
- 874 98. Windish DM, Gozu A, Bass EB, Thomas PA, Sisson SD, Howard DM, Kern DE: **A ten-**  
875 **month program in curriculum development for medical educators: 16 Years of**  
876 **experience.** *Journal of General Internal Medicine* 2007, **22(5):655-661.**
- 877 99. Derakhshan F, Allami A, Ahmadi S: **Effect of Faculty Training Programs on**  
878 **Improving Quality of Residency Exams in 2013-2014 %J Research in Medical**  
879 **Education.** 2015, **7(1):19-26.**
- 880 100. Sánchez-Mendiola M, Morales-Castillo D, Torruco-García U, Varela-Ruiz M: **Eight**  
881 **years' experience with a Medical Education Journal Club in Mexico: a quasi-**  
882 **experimental one-group study.** *BMC Medical Education* 2015, **15(1):1-8.**
- 883 101. Griffeth B, Wiederman M: **Faculty development effects on clerkship grades.** *Clinical*  
884 *Teacher* 2018, **15(2):151-155.**
- 885 102. Nemeč EC, Welch B: **The impact of a faculty development seminar on the quality of**  
886 **multiple-choice questions.** *Currents in Pharmacy Teaching and Learning* 2016,  
887 **8(2):160-163.**
- 888 103. Dellenges MA, Curtis DA: **Will a Short Training Session Improve Multiple-Choice**  
889 **Item-Writing Quality by Dental School Faculty? A Pilot Study.** *Journal of Dental*  
890 *Education* 2017, **81(8):948-955.**
- 891 104. Tenzin K, Dorji T, Tenzin T: **Construction of multiple choice questions before and**  
892 **after an educational intervention.** *Journal of the Nepal Medical Association* 2017,  
893 **56(205):112-116.**
- 894 105. Schlair S, Dyche L, Milan F: **Longitudinal Faculty Development Program to Promote**  
895 **Effective Observation and Feedback Skills in Direct Clinical Observation.**  
896 *MedEdPORTAL : the journal of teaching and learning resources* 2017, **13:10648-10648.**
- 897 106. Register S, Peterson DT, Swatzell K, White ML: **Effect of interprofessional (IP)**  
898 **faculty development on perceptions of IP collaboration and on IP behaviors.** *Journal*  
899 *of Interprofessional Care* 2019, **33(6):809-811.**
- 900 107. McCurdy FA, Beck G, Maroon A, Gomes H, Lane PH: **The administrative colloquium:**  
901 **Developing management and leadership skills for faculty.** *Ambulatory Pediatrics*  
902 2004, **4(1 SUPPL.):124-128.**
- 903 108. Rao SK, Carballo V, Cummings BM, Millham F, Jacobson JO: **Developing an**  
904 **Interdisciplinary, Team-Based Quality Improvement Leadership Training Program**

- 905 **for Clinicians: The Partners Clinical Process Improvement Leadership Program.**  
 906 *American Journal of Medical Quality* 2017, **32**(3):271-277.
- 907 109. Yanamadala M, Criscione-Schreiber LG, Hawley J, Heflin MT, Shah BR: **Clinical**  
 908 **Quality Improvement Curriculum for Faculty in an Academic Medical Center.**  
 909 *American Journal of Medical Quality* 2016, **31**(2):125-132.
- 910 110. Baldwin CD, Gusic ME, Chandran L: **The Impact of a National Faculty Development**  
 911 **Program Embedded Within an Academic Professional Organization.** *Academic*  
 912 *Medicine* 2017, **92**(8):1105-1113.
- 913 111. Fleming GM, Simmons JH, Xu M, Gesell SB, Brown RF, Cutrer WB, Gigante J, Cooper  
 914 WO: **A Facilitated Peer Mentoring Program for Junior Faculty to Promote**  
 915 **Professional Development and Peer Networking.** *Academic Medicine* 2015, **90**(6):819-  
 916 826.
- 917 112. Klein M, Niebuhr V, D'Alessandro D: **Innovative online faculty development utilizing**  
 918 **the power of social media.** *Academic Pediatrics* 2013, **13**(6):564-569.
- 919 113. Grimes DA, Schulz KF, Droegemueller W, Munsick RA, Lisanti S: **A faculty**  
 920 **development course in obstetrics and gynecology.** *American Journal of Obstetrics and*  
 921 *Gynecology* 2000, **183**(4):1041-1044.
- 922 114. Jackevicius CA, Le J, Nazer L, Hess K, Wang J, Law AV: **A formal mentorship**  
 923 **program for faculty development.** *American Journal of Pharmaceutical Education*  
 924 2014, **78**(5).
- 925 115. Reader S, Fornari A, Simon S, Townsend J: **Promoting Faculty Scholarship – An**  
 926 **evaluation of a program for busy clinician-educators.** *Canadian Medical Education*  
 927 *Journal* 2015, **6**(1):e43-e60.
- 928 116. John A, Joy TM, Paul N, Javed R, Sasidharan A, Menon UK: **Effectiveness of a ‘Short**  
 929 **training in teaching methodology’ for entry level medical teachers.** *Indian Journal of*  
 930 *Community Health* 2016, **28**(3):300-304.
- 931 117. Brown GE, Bharwani A, Patel KD, Lemaire JB: **An orientation to wellness for new**  
 932 **faculty of medicine members: meeting a need in faculty development.** *International*  
 933 *journal of medical education* 2016, **7**:255-260.
- 934 118. Srivastava TK, Waghmare LS, Rawekar A, Mishra VP: **Fostering educational research**  
 935 **among medical teachers: Evaluation of a faculty development program in India.**  
 936 *Journal of Clinical and Diagnostic Research* 2016, **10**(12):JC09-JC11.
- 937 119. Taylor CT, Berry TM: **A Pharmacy Faculty Academy to foster professional growth**  
 938 **and long-term retention of junior faculty members.** *American journal of*  
 939 *pharmaceutical education* 2008, **72**(2):32-32.

940
